1 CRISPR-TSKO facilitates efficient cell type-, tissue-, or organ-specific mutagenesis in  
2 Arabidopsis

3

4 Ward Decaestecker<sup>1,2,#</sup>, Rafael Andrade Buono<sup>1,2,#</sup>, Marie L. Pfeiffer<sup>1,2</sup>, Nick  
5 Vangheluwe<sup>1,2</sup>, Joris Jourquin<sup>1,2</sup>, Mansour Karimi<sup>1,2</sup>, Gert Van Isterdael<sup>3,4</sup>, Tom  
6 Beeckman<sup>1,2</sup>, Moritz K. Nowack<sup>1,2,\*</sup>, and Thomas B. Jacobs<sup>1,2,\*</sup>

7 1. Ghent University, Department of Plant Biotechnology and Bioinformatics,  
8 Technologiepark 71, 9052 Ghent, Belgium

9 2. VIB Center for Plant Systems Biology, Technologiepark 71, 9052 Ghent, Belgium

10 3. VIB Flow Core, VIB Center for Inflammation Research, Technologiepark 71, B-9052  
11 Ghent, Belgium.

12 4. Department of Internal Medicine, Ghent University, Ghent, Belgium.

13

14 # These authors contributed equally to the manuscript

15 \*Corresponding authors: TBJ [thjac@psb.vib-ugent.be](mailto:thjac@psb.vib-ugent.be), MKN [moritz.nowack@vib.be](mailto:moritz.nowack@vib.be)

16

17 **Abstract**

18 Detailed functional analyses of many fundamentally-important plant genes via  
19 conventional loss-of-function approaches are impeded by severe pleiotropic phenotypes.  
20 In particular, mutations in genes that are required for basic cellular functions and/or  
21 reproduction often interfere with the generation of homozygous mutant plants, precluding  
22 further functional studies. To overcome this limitation, we devised a CRISPR-based  
23 tissue-specific knockout system, CRISPR-TSKO, enabling the generation of somatic  
24 mutations in particular plant cell types, tissues, and organs. In Arabidopsis, CRISPR-  
25 TSKO mutations in essential genes caused well-defined, localized phenotypes in the root  
26 cap, stomatal lineage, or entire lateral roots. The underlying modular cloning system  
27 allows for efficient selection, identification, and functional analysis of mutant lines directly  
28 in the first transgenic generation. The efficacy of CRISPR-TSKO opens new avenues to  
29 discover and analyze gene functions in spatial and temporal contexts of plant life while  
30 avoiding pleiotropic effects of system-wide loss of gene function.

31

32

### 33 **Introduction**

34 The generation of stable, inheritable loss-of-function mutant alleles has been  
35 indispensable for functional genomic studies in plants. Such knockout or knockdown lines  
36 have been generated with various techniques such as ionizing radiation, ethyl  
37 methanesulfonate, T-DNA or transposon insertions, RNA interference (RNAi), or artificial  
38 microRNAs. In recent years there has been an explosion in the generation of knockout  
39 plant lines by clustered regularly interspaced short palindromic repeat (CRISPR)  
40 technology.

41 CRISPR technology contains two components, the CRISPR-associated (Cas) nuclease  
42 and CRISPR RNAs (crRNA) that direct the nuclease to the target nucleic acid. The most  
43 commonly used CRISPR system in plants is based on the CRISPR-associated 9 (Cas9)  
44 DNA endonuclease and its artificial crRNA, the guide RNA (gRNA) (Jinek et al., 2012). In  
45 plants, Cas9 is very efficient at inducing double-strand DNA breaks. DNA breaks repaired  
46 by the error-prone non-homologous end joining pathway ultimately result in the formation  
47 of short insertions and/or deletions (indels) at the break site (Bortesi and Fischer, 2015).  
48 These indels most often lead to frame shifts and/or early stop codons, effectively  
49 generating knockout mutations in the targeted gene(s).

50 Most CRISPR efforts in plants to date have focused on generating stable and inheritable  
51 mutant alleles for reverse genetics approaches. Yet this approach is limited as the  
52 knockout of many fundamentally-important genes convey severe pleiotropic phenotypes  
53 up to lethality. Of the approximately 25,000 protein-coding genes in the *Arabidopsis*  
54 *thaliana* genome, 10% are estimated to be indispensable (Lloyd et al., 2015). This  
55 presents a considerable challenge for functional analyses of genes with essential  
56 functions.

57 An approach to overcome these problems is the use of tissue-specific gene silencing  
58 (Alvarez et al., 2006; Schwab et al., 2006). However, gene silencing is often incomplete,  
59 interfering with the interpretation of the observed phenotypes. Furthermore, it has been  
60 well established that small RNAs can be mobile (Melnyk et al., 2011), limiting the tissue  
61 specificity in gene-silencing experiments. Therefore, the results obtained using gene  
62 silencing are often not comparable with the use of stably transmitted DNA-based mutants.

63 Transgenic vectors generating dominant-negative protein versions have been developed  
64 for certain genes. Expressing these mutant versions in a tissue-specific context can locally  
65 interfere with endogenous gene functions (Fukaki et al., 2005; Mitsuda et al., 2011). Other  
66 methods include the conditional knockout of genes in specific cell types or tissues by using  
67 a CRE-recombinase (Sieburth et al., 1998). These approaches, however, can be  
68 cumbersome and difficult to scale (Munoz-Nortes et al., 2017).

69 Outside of the plant field, researchers have recently overcome such limitations with the  
70 development of conditional knockouts using CRISPR technology. In zebrafish, the *gata1*  
71 promoter driving Cas9 expression was used to knockout genes specifically in the  
72 erythrocytic lineage (Ablain et al., 2015). In *Drosophila*, targeted knockout mutations in  
73 two essential genes *Wingless* and *Wntless* only in germ cells permitted the generation of  
74 adult flies, whereas ubiquitous knockout individuals did not survive past the pupal stage  
75 (Port et al., 2014). Additionally, cardiomyocyte-specific expression of Cas9 led to organ-  
76 specific knockout in a mouse model (Carroll et al., 2016). The use of tissue-specific  
77 promoters to drive Cas9 expression have been reported in plants (Hyun et al., 2015; Yan  
78 et al., 2015; Mao et al., 2016). However, these efforts have been done to increase the  
79 recovery of stably-transmitted mutant alleles. Recently, the fiber-specific *NST3/SND1*  
80 promoter was used to drive Cas9 expression and target the essential gene  
81 *hydroxycinnamoyltransferase* in *Arabidopsis* (Liang et al., 2019). This allowed the authors  
82 to specifically decrease lignin in xylem cells while avoiding the strong pleiotropic growth  
83 defects in full knockout mutants.

84 Herein, we describe the development of a CRISPR tissue-specific knockout (CRISPR-  
85 TSKO) vector system in *Arabidopsis* that allows for the specific generation of somatic DNA  
86 mutations in plants. The CRISPR-TSKO toolset is simple to use, highly efficient and allows  
87 for multiplexing and large-scale screening approaches. We show the potential of CRISPR-  
88 TSKO for somatic gene knockouts of essential genes in diverse plant cell types, tissues,  
89 and organs. We also detail important considerations and limitations on the use of  
90 CRISPR-TSKO and provide best practices for researchers. Our approach opens new  
91 opportunities to study the function of fundamentally-important genes in specific contexts  
92 of plant development and creates new possibilities to investigate post-embryonic  
93 developmental processes.

## 94 **Results**

### 95 **Proof-of-concept: tissue-specific GFP knockout in the lateral root cap**

96 We reasoned that by using tissue-specific, somatic promoters to drive Cas9 expression,  
97 CRISPR could be used to generate cell type-, tissue-, and organ-specific DNA mutations  
98 in plants. To test this hypothesis, T-DNA vectors were constructed with Cas9 expression  
99 controlled by the promoter region of *SOMBRERO/ANAC033* (*SMB*; AT1G79580). The  
100 *SMB* promoter (*pSMB*) is highly root cap-specific and activated directly after the formative  
101 division of root cap stem cells (Willemsen et al., 2008; Fendrych et al., 2014). A  
102 *pSMB:Cas9* expression cassette was combined with one of two gRNAs targeting the *GFP*  
103 coding sequence, GFP-1 and GFP-2, and transformed into a homozygous Arabidopsis  
104 line with ubiquitous expression of a nuclear-localized GFP and  $\beta$ -glucuronidase (GUS)  
105 fusion protein (*pHTR5:NLS-GFP-GUS* (Ingouff et al., 2017), henceforth, NLS-GFP).  
106 Primary transgenic plants (T1 seedlings) were selected via resistance to the herbicide  
107 glufosinate and investigated for loss of GFP signal in the root tips of five-day-old seedlings.  
108 Six out of eleven *pSMB:Cas9;GFP-1* events and three out of ten *pSMB:Cas9;GFP-2*  
109 events showed an almost complete loss of GFP specifically in the root cap, suggesting  
110 CRISPR-mediated knockout soon after the formative division of the root cap stem cells  
111 (**Supplementary File 1A**). All other root tissues maintained GFP expression, indicating  
112 that Cas9 activity specifically in the root cap cells led to cell-autonomous *GFP* knockout.  
113 The tissue-specific knockout phenotype (*de novo* generation of mutations) was heritable,  
114 as T2 progeny from three lines with *pSMB:Cas9;GFP-1* and three lines with  
115 *pSMB:Cas9;GFP-2* had no GFP fluorescence in root cap cells while having normal NLS-  
116 GFP expression in all other tissues examined (**Supplementary File 1B**). These results  
117 clearly indicated that the use of a tissue-specific promoter driving Cas9 can efficiently  
118 induce somatic, tissue-specific knockout phenotypes.

### 119 **Design of the CRISPR-TSKO gene knockout toolset**

120 To facilitate a wide range of future gene-modification approaches in an easy-to-use  
121 cloning system, we devised CRISPR-TSKO, a modular and versatile vector toolset based  
122 on Golden Gate technology and modified GreenGate vectors (Engler et al., 2008;  
123 Lampropoulos et al., 2013). CRISPR-TSKO is inexpensive and immediately compatible



152 antibiotic- or herbicide-free selection of transformed T1 seeds and permits screening for  
153 phenotypes directly in T1 seedlings. To facilitate the evaluation of tissue specificity and  
154 expression levels of Cas9, a nuclear-localized fluorescent mCherry tag was fused to the  
155 *Cas9* coding sequence via a P2A ribosomal skipping peptide (Cermak et al., 2017). Using  
156 this Cas9-P2A-mCherry expression cassette (henceforth, Cas9-mCherry) we targeted  
157 different tissue types, cell lineages, and organs in Arabidopsis to explore the potential of  
158 CRISPR-TSKO for plant research.

### 159 **Root-cap specific gene knockout**

160 To confirm the functionality of our new vector system, the expression of Cas9-mCherry  
161 was controlled by *pSMB* and combined with the gRNA GFP-1. Ten of the 21 T1 seedlings  
162 showed a loss of GFP fluorescence specifically in the root cap, while six were chimeric  
163 (partial loss of GFP) and five maintained normal GFP expression (**Figure 2A, Table 1**).  
164 We observed a delay in the onset of the knockout phenotype as cells of the youngest root  
165 cap layers had overlapping signals of GFP and mCherry (**Figure 2B**). This suggests that  
166 a certain time for mRNA and/or protein turnover of GFP is required after the onset of Cas9  
167 expression for the knockout phenotype to become apparent. We observed a clear  
168 correlation between the intensity of mCherry signal and the penetrance of the knockout  
169 phenotype; all ten highly-expressing mCherry lines were entirely devoid of GFP signal in  
170 the root-cap (except for the youngest cells), the medium mCherry-expressing lines had  
171 chimeric knockout phenotypes and the low-to-no mCherry lines had chimeric or full  
172 expression of GFP (**Table 1**). By comparing the intensity of both fluorescent proteins in  
173 individual root cap nuclei, we confirmed that highly expressing Cas9 lines have a  
174 significantly higher probability of gene knockout (**Figure 2C**).

175

176

177

178

179

180

181 **Table 1.** Phenotypes of T1 seedlings transformed with *pSMB:Cas9-mCherry;GFP-1*

|                 |    | GFP Signal |        |  |
|-----------------|----|------------|--------|--|
| mCherry         | No | Chimeric   | Normal |  |
| High            | 10 | 0          | 0      |  |
| Medium          | 0  | 3          | 0      |  |
| Low/No          | 0  | 3          | 5      |  |
| Total seedlings |    | 21         |        |  |

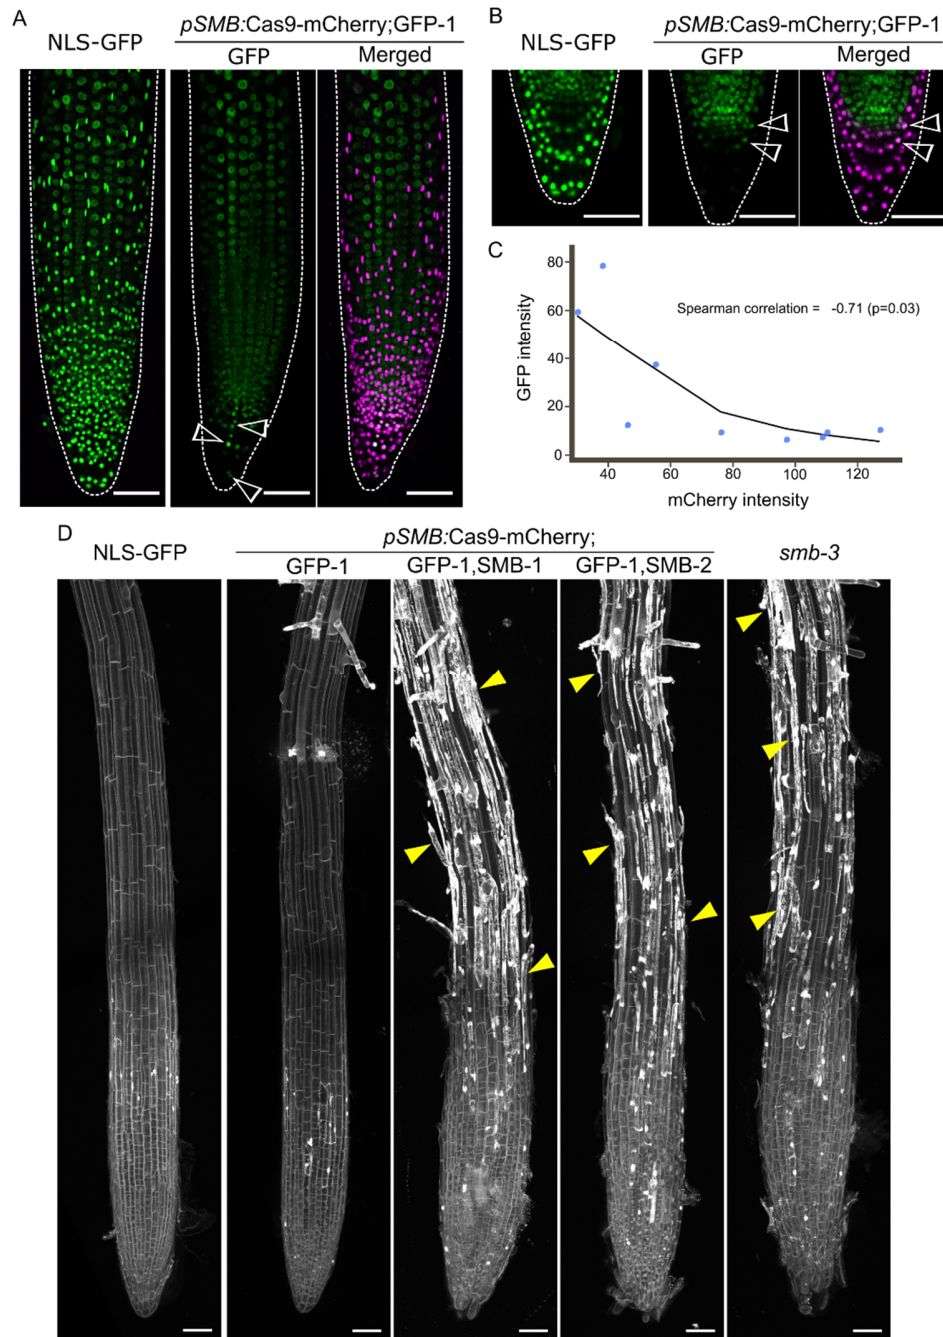

182

183 **Figure 2: Root-cap specific knockout with CRISPR-TSKO**

184 **A**, Maximum intensity projection of representative seedling of NLS-GFP and T1 of *pSMB:Cas9-*  
185 *mCherry;GFP-1* with absence of GFP and presence of Cas9-mCherry signal specific to root cap cells. GFP  
186 is shown in green and Cas9-mCherry in magenta. Arrowheads indicate a patch of root cap cells in which  
187 GFP knockout was not achieved (chimera). **B**, Mid-section of root tip of both NLS-GFP and T1 seedling of  
188 *pSMB:Cas9-mCherry;GFP-1*. Arrowheads show young root cap cells in which GFP signal can still be  
189 observed. **C**, Plot of median intensity of root cap nuclei for both GFP and Cas9-mCherry in T1 seedlings.  
190 Line shows a Loess regression curve. **D**, Overview of root tips of 6 DAG T2 seedlings for both gRNAs for  
191 *SMB* displaying the characteristic cell corpse accumulation at the root surface (yellow arrowheads) with  
192 propidium iodide staining. All scale bars represent 50  $\mu$ m.



193 To test if a root-cap expressed gene, the NAC transcription factor *SMB* itself, could be  
 194 successfully targeted by CRISPR-TSKO, the gRNA GFP-1 was combined with one of two  
 195 different gRNAs targeting *SMB* (*SMB*-1 and -2) with Cas9 expression driven by *pSMB*.  
 196 Loss of *SMB* delays root cap maturation and preparation of programmed cell death in root  
 197 cap cells, causing larger root caps and a delayed and aberrant root cap cell death with a  
 198 lack of cell corpse clearance (Bennett et al., 2010; Fendrych et al., 2014). In T1 seedlings,  
 199 we found *smb* mutant phenotypes for both *SMB*-1 and -2 coupled with the disappearance  
 200 of root cap GFP signal (**Supplementary File 4A**). Both gRNAs appear equally effective  
 201 as 13 out of 21 and 9 out of 12 T1 events gave clear simultaneous *smb* and *GFP* knockout  
 202 phenotypes, respectively (**Table 2, Supplementary File 4A**). Knockout phenotypes were  
 203 scored in four segregating lines in the T2 generation. The *smb* and *GFP* knockout  
 204 phenotypes were observed in all FAST-positive T2 seedlings, whereas all FAST-negative  
 205 seedlings (null segregants) showed no knockout phenotypes (**Figure 2D, Supplementary**  
 206 **File 4B, Table 3**). These data demonstrate that CRISPR-TSKO-induced mutations are  
 207 strictly somatic when using *pSMB* and that the mutagenic effect is heritable.

208 **Table 2.** Phenotypes of T1 seedlings transformed with *pSMB*:Cas9-mCherry;GFP-1,*SMB*-1 and  
 209 *pSMB*:Cas9-mCherry;GFP-1,*SMB*-2

| Vector               | mCherry     | GFP Signal |          |         | <i>smb</i> Phenotype |         |         |
|----------------------|-------------|------------|----------|---------|----------------------|---------|---------|
|                      |             | No         | Chimeric | Normal  | Yes                  | Weak    | No      |
| GFP-1, <i>SMB</i> -1 | High        | 12 (57%)   | 0        | 0       | 11 (52%)             | 1 (5%)  | 0       |
|                      | Medium      | 3 (14%)    | 0        | 0       | 1 (5%)               | 2 (10%) | 0       |
|                      | Low         | 0          | 0        | 2 (10%) | 0                    | 0       | 2 (10%) |
|                      | No/Very low | 1 (5%)     | 1 (5%)   | 2 (10%) | 1 (5%)               | 0       | 3 (14%) |
| GFP-1, <i>SMB</i> -2 | High        | 8 (67%)    | 0        | 0       | 7 (58%)              | 0       | 1 (8%)  |
|                      | Medium      | 0          | 0        | 0       | 0                    | 0       | 0       |
|                      | Low         | 0          | 3 (25%)  | 1 (8%)  | 2 (17%)              | 0       | 2 (17%) |
|                      | No/Very low | 0          | 0        | 0       | 0                    | 0       | 0       |

210

211 **Table 3.** Segregating phenotypes in T2 *pSMB:Cas9-mCherry;GFP-1,SMB-1* and *pSMB:Cas9-*  
 212 *mCherry;GFP-1,SMB-2*

| T1 Line                | FAST | n  | mCherry |    | GFP Signal |        | <i>smb</i> Phenotype |      |    |
|------------------------|------|----|---------|----|------------|--------|----------------------|------|----|
|                        |      |    | +       | -  | No         | Normal | Yes                  | Weak | No |
| GFP-1,SMB-1<br>Line 2  | +    | 34 | 34      | 0  | 34         | 0      | 33                   | 1    | 0  |
|                        | -    | 30 | 0       | 30 | 0          | 30     | 0                    | 0    | 30 |
| GFP-1,SMB-1<br>Line 16 | +    | 21 | 21      | 0  | 21         | 0      | 19                   | 2    | 0  |
|                        | -    | 30 | 0       | 30 | 0          | 30     | 0                    | 0    | 30 |
| GFP-1,SMB-2<br>Line 12 | +    | 30 | 30      | 0  | 30         | 0      | 29                   | 1    | 0  |
|                        | -    | 25 | 0       | 25 | 0          | 25     | 0                    | 0    | 25 |
| GFP-1,SMB-2<br>Line 5  | +    | 26 | 26      | 0  | 26         | 0      | 25                   | 1    | 0  |
|                        | -    | 33 | 0       | 33 | 0          | 33     | 0                    | 0    | 33 |

213

214 To determine if the observed phenotypes were due to root cap-specific DNA mutations,  
 215 protoplasts were prepared from root tips of four independent T2 lines (two for each *SMB*  
 216 target) and used for fluorescence-activated cell sorting (FACS). DNA was extracted from  
 217 sorted populations and the *SMB* and *GFP* target loci were PCR amplified and Sanger  
 218 sequenced. TIDE analysis (Brinkman et al., 2014) was performed to determine the  
 219 frequency and type of knockout alleles generated. The mCherry-positive populations  
 220 (Cas9 expressing) had indel frequencies (TIDE Score) >95% for the GFP-1, SMB-1 and  
 221 SMB-2 target loci (**Supplementary File 5**). In contrast, the mCherry-negative cell  
 222 populations had indel frequencies of 1-5%, which are equivalent to wild-type or  
 223 background levels when using TIDE analysis. The alleles generated were largely  
 224 consistent across events, with 1-bp insertions being the predominant outcome (58-94%)  
 225 followed by 1-bp deletions (3-38%; **Supplementary File 5**) for the GFP-1 target locus. A  
 226 small, but significant, proportion of alleles were in-frame (3-bp deletions), but, as the GFP-  
 227 1 gRNA targets the essential residue Gly67 (Fu et al., 2015), these alleles likely result in  
 228 no GFP fluorescence. For the two *SMB*-targeting gRNAs, 1-bp insertions were the  
 229 predominant repair outcome (78-88%) and a minority (~10%) of alleles being 1-bp  
 230 deletions for SMB-1 and 3-bp deletions for SMB-2 (**Supplementary File 5**). Thus the

231 consistent *GFP* and *SMB* knockout phenotypes observed are due to an active and  
232 heritable Cas9-induced somatic mutagenesis specifically in root cap cells.

### 233 **Cell-lineage-specific gene knockout in the stomatal lineage**

234 To test the possibility of using CRISPR-TSKO in a different somatic context, we utilized  
235 two promoter elements active in the stomatal cell lineage. The promoters of *TOO MANY*  
236 *MOUTHS* (*TMM*; AT1G80080) and *FAMA* (AT3G24140) control gene expression in the  
237 stomatal lineage, with *pTMM* expressing early in the lineage (Nadeau and Sack, 2002)  
238 and *pFAMA* expressing later during the formation of guard mother cells and young guard  
239 cells (Ohashi-Ito and Bergmann, 2006). These two promoters were used to produce  
240 CRISPR-TSKO constructs simultaneously targeting *GFP* and *PHYTOENE*  
241 *DESATURASE 3* (*PDS3*; AT4G14210) in the stomatal lineage as they should give clear  
242 knockout phenotypes. *PDS3* is essential for chlorophyll, carotenoid and gibberellin  
243 biosynthesis. Null mutants show a dwarfed and albino phenotype and cannot survive on  
244 soil (Qin et al., 2007). Consistent with this, the ubiquitously-expressed Cas9-mCherry  
245 (*pPcUbi*:Cas9-mCherry;GFP-1,*PDS3*) gave rise to the expected severe phenotypic  
246 effects ranging from full albino to variegated leaves and stunted plants (**Figure 3A,**  
247 **Supplementary File 6A**).

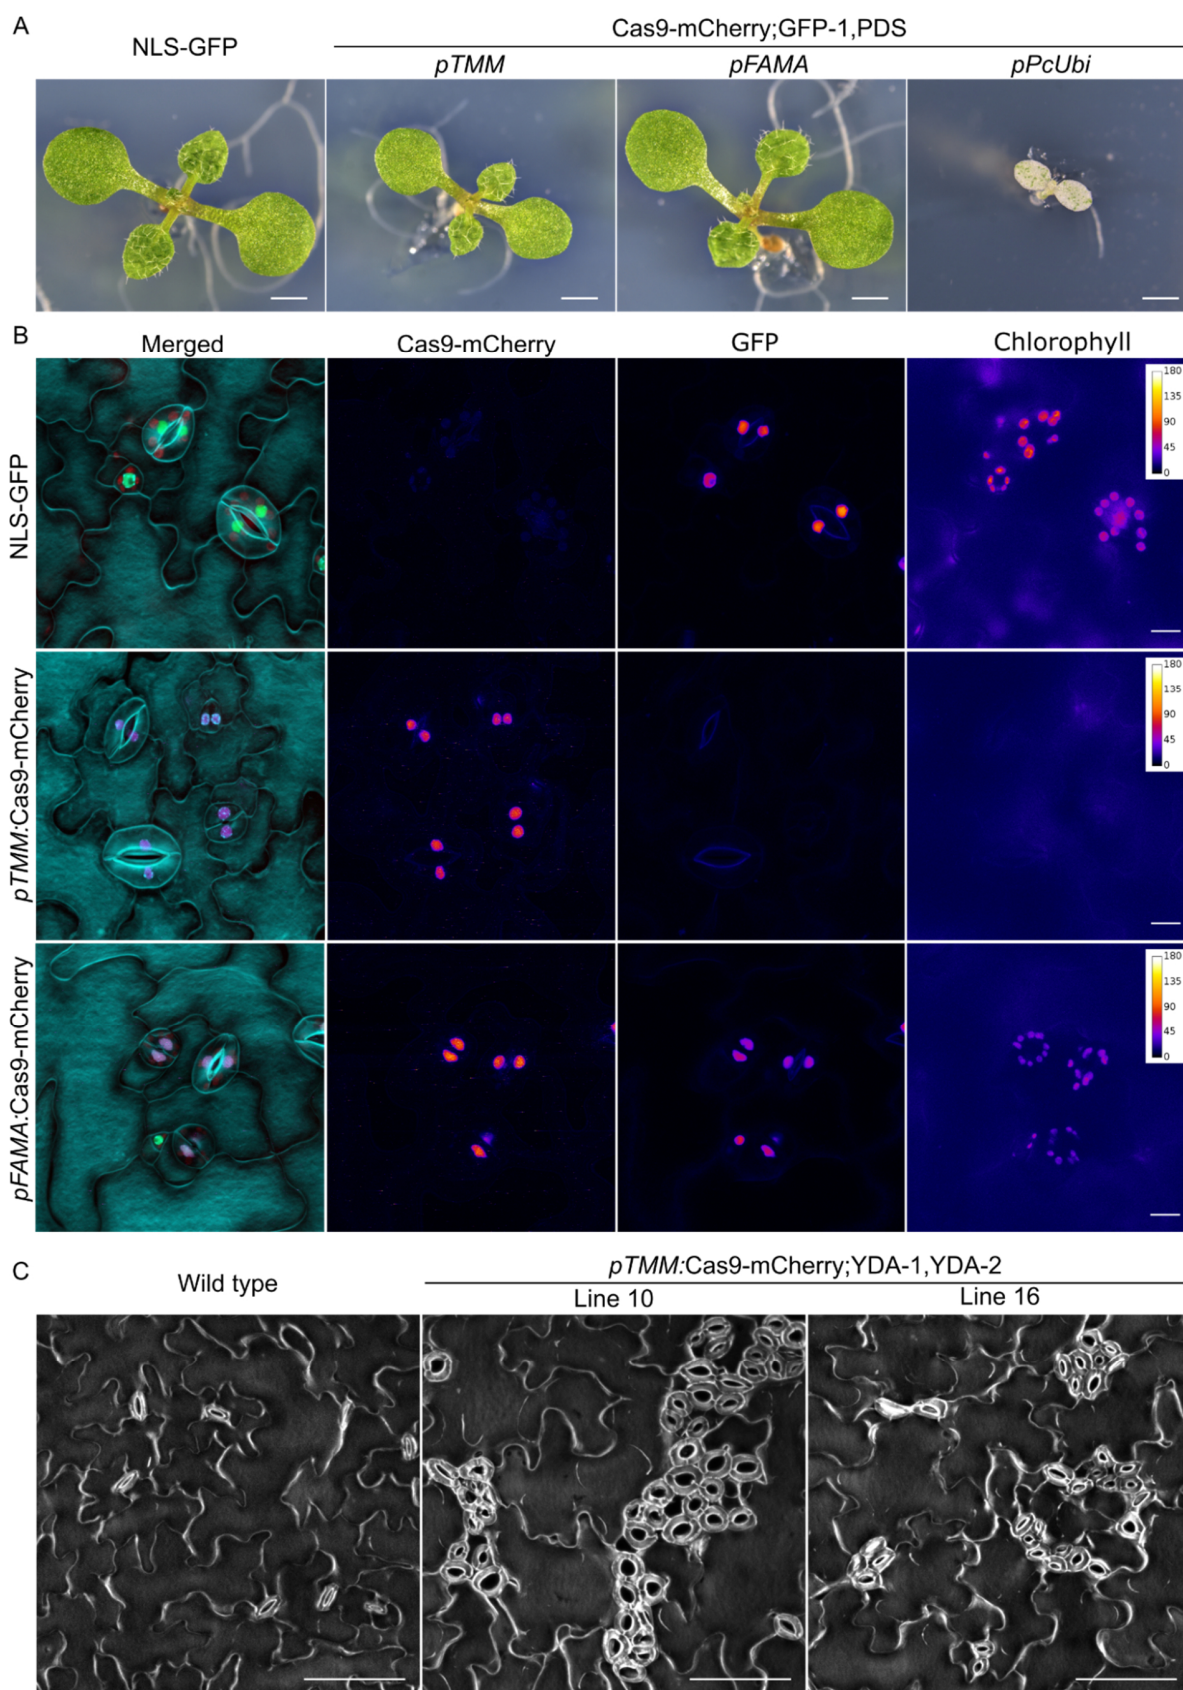

249 **Figure 3: Stomatal-lineage specific knockout with CRISPR-TSKO**

250 **A**, 9 DAG seedlings showing the partial rescue when *PDS3* is knocked out only in stomatal lineage (*pTMM*)  
251 in comparison with the arrested albino seedlings of ubiquitous knockout (*pPcUb*). Scale bars represent 1  
252 mm. **B**, Simultaneous stomata-lineage specific knockout of GFP and chlorophyll biosynthesis in 5 DAG T1  
253 seedlings. Shown are stomata at the abaxial face of cotyledons. While both GFP and chlorophyll signals  
254 are lost in stomata in lines under the control of *pTMM*, signal is still present in stomata in lines under the  
255 control of *pFAMA*. In merged image, cell outlines are in cyan, GFP in green, Cas9-mCherry in magenta,  
256 and chlorophyll fluorescence in red. Epidermal cell patterning is shown using DAPI staining. Scale bars  
257 represent 10  $\mu$ m. **C**, Targeting of *YDA* only in stomatal lineage (*pTMM*) is sufficient to cause clustering of  
258 stomata. Clusters of stomata are shown on the adaxial face of cotyledons of 15 DAG T2 seedlings. Scale  
259 bars represent 100  $\mu$ m.

260  
261 Five days after germination, cotyledons of T1 seedlings were assessed for chlorophyll and  
262 GFP fluorescence by epifluorescence microscopy. Eighteen out of 20 *pTMM*:Cas9-  
263 mCherry;GFP-1,PDS-1 T1 seedlings were clearly lacking both GFP and chlorophyll  
264 fluorescence (**Figure 3B**), indicative of successful knockouts in both genes. In a separate  
265 experiment, two out of 23 T1 seedlings did exhibit some mild bleaching similar to the  
266 ubiquitous knockout events (**Supplementary File 6A**), suggesting that *pTMM* can drive  
267 Cas9-mCherry expression in mesophyll cells at a low frequency. Independent T2  
268 *pTMM*:Cas9 plants were generally smaller than the NLS-GFP background line  
269 (**Supplementary File 7**), but were otherwise not affected in vegetative and reproductive  
270 development. Thus, restricting the loss of *PDS3* to the stomatal lineage did not markedly  
271 affect plant development.

272 In contrast to the high frequency of *GFP* and *PDS3* knockout phenotypes in *pTMM*:Cas9-  
273 mCherry;GFP-1;PDS3 events, we observed neither a loss of GFP nor chlorophyll  
274 fluorescence in 21 mCherry-expressing *pFAMA* T1 seedlings evaluated (**Figure 3B**). We  
275 hypothesized that the later induction of Cas9 by *pFAMA* allowed for residual *PDS3* and  
276 *GFP* mRNA and/or protein to persist in the targeted cells and these pools would have to  
277 be depleted before a loss of signal could be observed. Therefore, we investigated  
278 cotyledons ten days after germination in five *pTMM*:Cas9 and eight *pFAMA*:Cas9 T1  
279 events. Despite this extended cultivation time, mCherry-positive guard cells still showed  
280 clear GFP and chlorophyll fluorescence signals in the *pFAMA*:Cas9 lines  
281 (**Supplementary File 6B**).

282 To determine if DNA mutations were induced in both the *pTMM:Cas9* and *pFAMA:Cas9*  
283 lines, protoplasts were prepared from T2 cotyledons of two independent lines for each  
284 genotype and sorted for mCherry. Surprisingly, mCherry-positive cells from one  
285 *pFAMA:Cas9* line (13652.12) showed a reduced GFP fluorescence intensity during cell  
286 sorting (**Supplementary File 8C**). Genotyping results of the mCherry-positive and -  
287 negative protoplast populations determined an indel frequency of ~80% for the *GFP* and  
288 *PDS3* target loci for the *pTMM:Cas9* lines and 30-74% for the *pFAMA:Cas9* lines  
289 (**Supplementary File 9**). The indel spectra for the *pTMM:Cas9* line showed a preference  
290 for the 1-bp insertion. While the *pFAMA:Cas9* lines have the same preference for the 1-  
291 bp insertion, they also have a greater variety of alleles from 3-bp deletions to 2-bp  
292 insertions (**Supplementary File 9**).

293 The detection of mutations in both *pFAMA:Cas9* lines and the reduced GFP intensity  
294 detected by flow cytometry in one line was surprising given that a reduction of GFP signal  
295 was not observed by microscopy. To rule out technical errors, a second sorting experiment  
296 was performed on the two previously-sorted *pFAMA:Cas9* T2 lines plus two additional  
297 lines. From these four lines, we clearly observed indel frequencies of 23-75% for *GFP* and  
298 34-86% for *PDS3* (**Supplementary File 10**). Again, line 1365.12 had the highest indel  
299 frequencies and a reduction of GFP intensity (**Supplementary File 11**). These results  
300 indicate that DNA mutations were generated in the mCherry-expressing cells for both  
301 CRISPR-TSKO constructs, but do not resolve why knockout phenotypes were not  
302 observed in *pFAMA:Cas9* lines.

303 To test if CRISPR-TSKO can be used to manipulate cell fate decisions within the stomatal  
304 lineage, we targeted *YODA* (*YDA*; AT1G63700), a mitogen-activated protein kinase  
305 kinase kinase. Knockout mutants of *YDA* have clustered stomata, severe developmental  
306 defects, frequent seedling growth arrest and, if *yda* mutants do manage to survive until  
307 flowering, sterility (Bergmann et al., 2004; Lukowitz et al., 2004). When we targeted *YDA*  
308 with a pair of gRNAs in a single, ubiquitously-expressed Cas9 construct (*pPcUbi:Cas9*-  
309 mCherry;YDA-1,YDA-2), 33 out of 35 mCherry-positive T1 seedlings contained clustered  
310 stomata on the cotyledonary epidermis to varying degrees of severity (**Supplementary**  
311 **File 12A**). Eight out of 19 T1 plants transferred to soil were sterile, consistent with the

312 strong pleiotropic effects observed in reported *yda* mutants. When *YDA* was targeted by  
313 *pTMM:Cas9-mCherry;YDA-1,YDA-2*, all 40 T1 mCherry-positive seedlings had a  
314 clustered-stomata phenotype similar to that of the *yda-1* mutant, yet without the  
315 corresponding growth arrest (**Figure 3C, Supplementary File 12C**). All 19 plants  
316 transferred to soil developed similarly to wild-type and were fertile.

317 PCR and DNA sequence analysis confirmed efficient mutagenesis of *YDA* in T1 seedlings  
318 transformed with both *pPcUbi:Cas9* and *pTMM:Cas9* vectors. As a pair of gRNAs target  
319 *YDA*, an 813-bp deletion can be expected by the excision of the intervening DNA  
320 sequence. Such deletion events were observed in events transformed with both vectors  
321 (**Supplementary File 12B**). Indel frequencies for *pPcUbi:Cas9* events were higher than  
322 *pTMM:Cas9* as is expected for ubiquitous versus stomata-specific targeting  
323 (**Supplementary File 13**). These results illustrate that by utilizing the stomatal lineage-  
324 specific *pTMM*, we are able to uncouple the pleiotropic growth defects and sterility in  
325 systemic *YDA* knockouts (Lukowitz et al., 2004), but still retain the characteristic clustered-  
326 stomata phenotype.

### 327 **Organ-specific gene knockout in lateral roots**

328 Next to gene-knockout in particular tissues and cell lineages, we tested the potential of  
329 CRISPR-TSKO to generate mutant organs on otherwise wild-type plants. To this end we  
330 made use of the promoter sequence of *GATA23*, a gene that marks the onset of lateral  
331 root organogenesis and is expressed in pericycle cells primed to become involved in  
332 lateral root formation in *Arabidopsis* (De Rybel et al., 2010). *GATA23* expression is  
333 transient and disappears prior to the emergence of the primordium from the primary root,  
334 except for some remaining expression at the base of the primordium (De Rybel et al.,  
335 2010) (**Figure 4A**). When targeting *GFP* with *pGATA23:Cas9-mCherry;GFP-1*, 20 out of  
336 23 mCherry-positive T1 seedlings showed a complete or partial loss of GFP fluorescence  
337 in lateral roots while maintaining normal GFP expression in the primary root (**Figure 4A,B,**  
338 **Table 4**). In contrast, lines with undetectable mCherry expression showed chimeric or  
339 normal GFP expression in lateral roots (**Table 4**). Sequence analysis of lateral roots from  
340 six independent knockout events confirmed >93% of the alleles were mutated in those  
341 organs (**Supplementary File 14**). The indel spectrum was similar as the other tissue

342 types, with the 1-bp insertion being the dominant repair outcome (**Supplementary File**  
 343 **14**).

344 Knockout phenotypes were scored in three segregating lines in the T2 generation. For  
 345 two lines, all FAST-positive plants had no GFP expression in the lateral roots, while in line  
 346 3, 15 out of 17 plants had no GFP expression in lateral roots (**Table 5**). Together, these  
 347 experiments demonstrate that organ-specific gene knockout in lateral roots is highly  
 348 efficient via the xylem-pole pericycle-expressed Cas9 controlled by *pGATA23*.

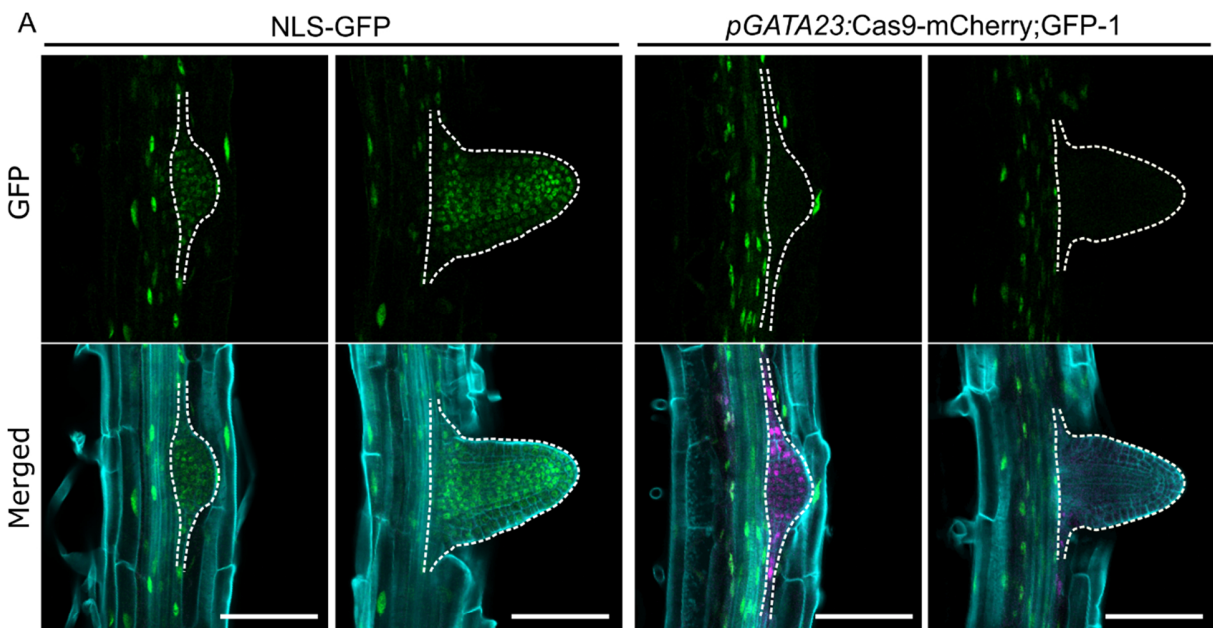

**B** NLS-GFP *pGATA23*:Cas9-mCherry;GFP-1

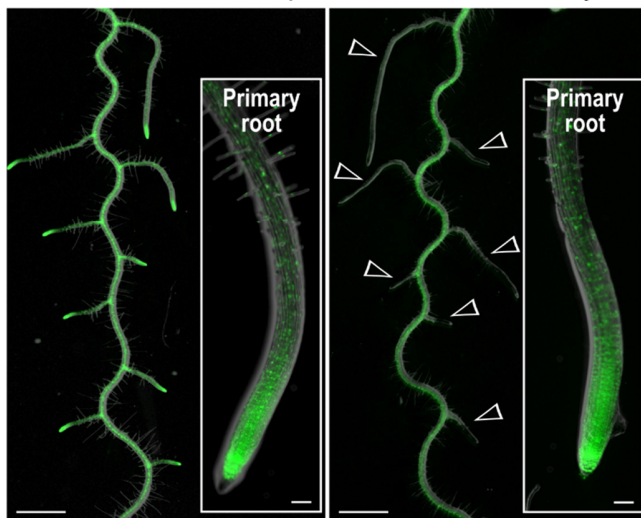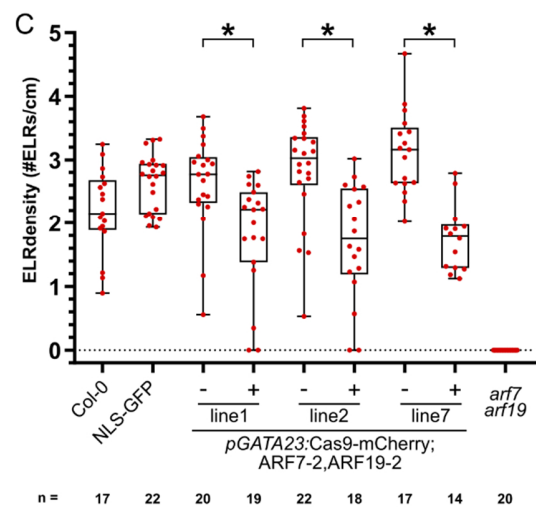

349



350

351 **Figure 4: Organ-specific gene knockout using *pGATA23*-CRISPR-TSKO**

352 **A**, Specific knockout of the GFP signal in emerging lateral roots (dashed outline). Representative images of  
 353 the NLS-GFP control and *pGATA23*:Cas9-mCherry;GFP-1. GFP in green, mCherry in magenta, and cell  
 354 wall stained with calcofluor white displayed in cyan. Scale bars represent 100  $\mu$ m. **B**, GFP knockout is  
 355 specific to lateral roots. Overlay of root morphology and GFP signal is shown for a representative NLS-GFP  
 356 control and a T2 *pGATA23*:Cas9-mCherry;GFP-1 seedling. Arrowheads indicate GFP negative lateral roots.  
 357 Insets are the tip of primary roots. Scale bars represent 1 mm for overview and 100 $\mu$ m for inset. **C**,  
 358 Quantification of the emerged lateral root (ELR) density for Col-0 and FAST-positive (+) and –negative (-)  
 359 T2 seedlings of *pGATA23*-CRISPR-TSKO lines targeting *ARF7* and *ARF19* simultaneously. ELR density  
 360 was compared between FAST positive and negative seedlings within each line via Poisson regression  
 361 analyses. \* indicates *p* values smaller than  $2 \times 10^{-3}$ .

362

363 **Table 4.** GFP phenotype in lateral roots of *pGATA23*:Cas9-mCherry;GFP-1

|                 | GFP signal in LR |    |                 |
|-----------------|------------------|----|-----------------|
|                 | mCherry          | No | Chimeric Normal |
| Positive        | 15               | 5  | 3               |
| Negative        | 0                | 3  | 27              |
| Total seedlings | 15               | 8  | 30              |

364

365 **Table 5.** Phenotypic analysis of T2 seedlings of *pGATA23*:Cas9-mCherry;GFP-1. Plant indicated with an  
 366 asterisk (\*) showed no GFP signal in entire plant.

367

| T1     | FAST | n  | mCherry |    | GFP in LR |        |
|--------|------|----|---------|----|-----------|--------|
|        |      |    | +       | -  | No        | Normal |
| Line 1 | +    | 16 | 16      | 0  | 16        | 0      |
|        | -    | 10 | 0       | 10 | 0         | 10     |
| Line 2 | +    | 7  | 7       | 0  | 7         | 0      |
|        | -    | 18 | 0       | 18 | 1*        | 17     |
| Line 3 | +    | 17 | 17      | 0  | 15        | 2      |
|        | -    | 20 | 0       | 20 | 0         | 20     |

368

369 Lateral root organogenesis depends on the partially redundant action of *AUXIN*  
370 *RESPONSE FACTOR (ARF) 7* (AT5G20730) and *ARF19* (AT1G19220) as lateral root  
371 initiation is strongly inhibited in *arf7arf19* double-knockout mutants (Okushima et al.,  
372 2007). As both *ARFs* are broadly expressed in Arabidopsis seedlings, it is unclear whether  
373 this phenotype depends on *ARF7* and *ARF19* function strictly in xylem-pole pericycle cells  
374 (Okushima et al., 2005). To test this hypothesis, we used CRISPR-TSKO with *pGATA23*  
375 to target both *ARF7* and *ARF19*. We first recapitulated the ubiquitous double-knockout  
376 line *arf7arf19* with two ubiquitously-expressed Cas9 constructs each containing two  
377 different gRNAs targeting both *ARFs* (*pPcUbi:Cas9-mCherry;ARF7-1,ARF19-1* and  
378 *pPcUbi:Cas9-mCherry;ARF7-2,ARF19-2*). While, no obvious reduction in lateral root  
379 density was observed in the T1 plants containing the first construct (*pPcUbi:Cas9-*  
380 *mCherry;ARF7-1,ARF19-1*), 18 out of 26 T1 plants containing the second construct  
381 (*pPcUbi:Cas9-mCherry;ARF7-2,ARF19-2*) completely lacked lateral roots  
382 (**Supplementary File 15A**) which is consistent with the phenotype of *arf7arf19* seedlings  
383 (Okushima et al., 2005). In agreement with these phenotyping results, sequencing of the  
384 target loci in whole roots showed that the *pPcUbi:Cas9-mCherry;ARF7-1,ARF19-1*  
385 construct was particularly ineffective as the *ARF19-1* target locus had an indel frequency  
386 of only 9-13% (**Supplementary File 16**), explaining the lack of a mutant phenotype in  
387 those T1s. In comparison, the indel frequencies were >93% for most events with the  
388 *pPcUbi:Cas9-mCherry;ARF7-2,ARF19-2* construct (**Supplementary File 16**).

389 Emerged lateral root density was quantified in three segregating T2 lines transformed with  
390 *pGATA23:Cas9-mCherry;ARF7-2,ARF19-2*. Slight but significant reductions in emerged  
391 lateral root density was observed in FAST-positive T2 plants (**Figure 4C and**  
392 **Supplementary File 15B**). As these results were inconsistent with those of the  
393 ubiquitously-expressed construct, we sequenced the *ARF7* and *ARF19* target loci in  
394 lateral roots of at least three plants per line. TIDE analysis revealed indel frequencies of  
395 >83% for *ARF7-2* and >92% for *ARF19-2* for nine out of ten plants and no wild-type alleles  
396 for either gene could be detected in lateral roots of four plants (**Supplementary File 17**).  
397 Thus lateral root initiation is only mildly affected when *ARF7* and *ARF19* are knocked out  
398 in *GATA23*-expressing pericycle cells.

399 The central cell cycle regulator *CYCLINE-DEPENDENT KINASE A1* (*CDKA;1*;  
400 AT3G48750) is homologous to *CDK1* and *CDK2* in mammals and cell proliferation in  
401 *cdka;1* null mutants is severely affected (Nowack et al., 2012). Mutant embryos are  
402 superficially normal in appearance, but only contain a fraction of the number of cells that  
403 make up the wild-type embryo. Mutant seedlings are not viable on soil, but can be  
404 cultivated as sterile dwarf plants without a root system in axenic liquid cultures (Nowack  
405 et al., 2012). We generated CRISPR-TSKO constructs to specifically knockout *CDKA;1* in  
406 the lateral root primordia to allow us to study the effect of *CDKA;1* in the context of lateral  
407 root formation. We started by testing the efficiency of our gRNAs using ubiquitously-  
408 expressed Cas9 with a paired-gRNA construct (*pPcUBI*:Cas9-mCherry;*CDKA1*-  
409 1,*CDKA1*-2). T1 seedlings reproduced the reported dwarf-seedling phenotype (Nowack  
410 et al., 2012) and genotyping revealed a 171-bp deletion, corresponding to the excision of  
411 the intervening DNA sequence (**Supplementary File 18**). TIDE analysis of the upper band  
412 showed higher indel frequencies with the gRNA *CDKA1*-1 (48-99%) than for gRNA  
413 *CDKA1*-2 (16-79%; **Supplementary File 18**). The same gRNAs were also used with a  
414 *pGATA23* construct. All T1 transgenic plants grew normally and were fertile. In T2, we  
415 were surprised that lateral root development was not as severely affected as anticipated;  
416 lateral root density was unaffected and lateral roots of FAST-positive T2 plants were 62-  
417 69% the length of their null-segregant siblings (**Figure 5A, C**).

418 As the *CDK* gene family in *Arabidopsis* is composed of 10 partially redundant members  
419 (De Veylder et al., 2007), we hypothesized that the elimination of *CDKA;1* in lateral roots  
420 was being compensated for by the action of two B-type CDKs (*CDKB1;1*, AT3G54180 and  
421 *CDKB1;2*, AT2G38620). In contrast to the *cdka;1* single mutant, *cdka;1 cdkb1;1* double  
422 mutants are embryo lethal, with embryo development arresting after a few rounds of cell  
423 divisions (Nowack et al., 2012). Therefore, we combined the gRNA *CDKA1*-1 with one of  
424 two different gRNAs that simultaneously target both *CDKB1* genes to generate triple  
425 knockouts (*pPcUBI*:Cas9-mCherry;*CDKA1*-1,*CDKB1*-1 and *pPcUBI*:Cas9-  
426 mCherry;*CDKA1*-1,*CDKB1*-2). If effective, we expected severe seedling phenotypes or  
427 even failure to recover FAST-positive T1 seeds. Indeed, the few FAST-positive T1  
428 seedlings we could recover showed severe developmental defects and many died in  
429 axenic culture (**Supplementary File 19**). We were able to isolate DNA from some of these

430 seedlings and confirmed that indel frequencies were >90% for all three genes in four out  
431 of seven independent *pPcUBI:Cas9-mCherry;CDKA1-1,CDKB1-1* lines (**Supplementary**  
432 **File 19 and 20**). The second *CDKB1* gRNA was less effective as most events had indel  
433 frequencies of only ~20-70%. It is important to note that due to the severe growth defects  
434 in these mutants, we observed a negative selection pressure against events transformed  
435 with the *pPcUBI:Cas9-mCherry;CDKA1-1,CDKB1-1* (**Supplementary File 21**) and many  
436 of the most severely affected plants did not yield sufficient DNA for genotyping.  
437 Nevertheless, these results indicate that both gRNAs are effective, with the *CDKB1-1*  
438 gRNA being more efficient.

439 We next generated triple *CDK* lateral root knockouts via a *pGATA23* construct.  
440 Macroscopically, the transgenic lines exhibited an apparent lack of lateral roots (**Figure**  
441 **5A**). However, upon closer inspection, we found that lateral roots did form, but they  
442 arrested growth soon after emergence (**Figure 5B, D**). These stunted lateral roots show  
443 the characteristic reduced number of cells and the presence of grossly enlarged epidermal  
444 and cortex cells in mutants severely affected in cell cycle progression (Nowack et al.,  
445 2012). Furthermore, we detected a slight but significant reduction in emerged lateral root  
446 density in FAST-positive segregants in three independent lines (**Figure 5C**), suggesting  
447 that some lateral roots did arrest before emergence.

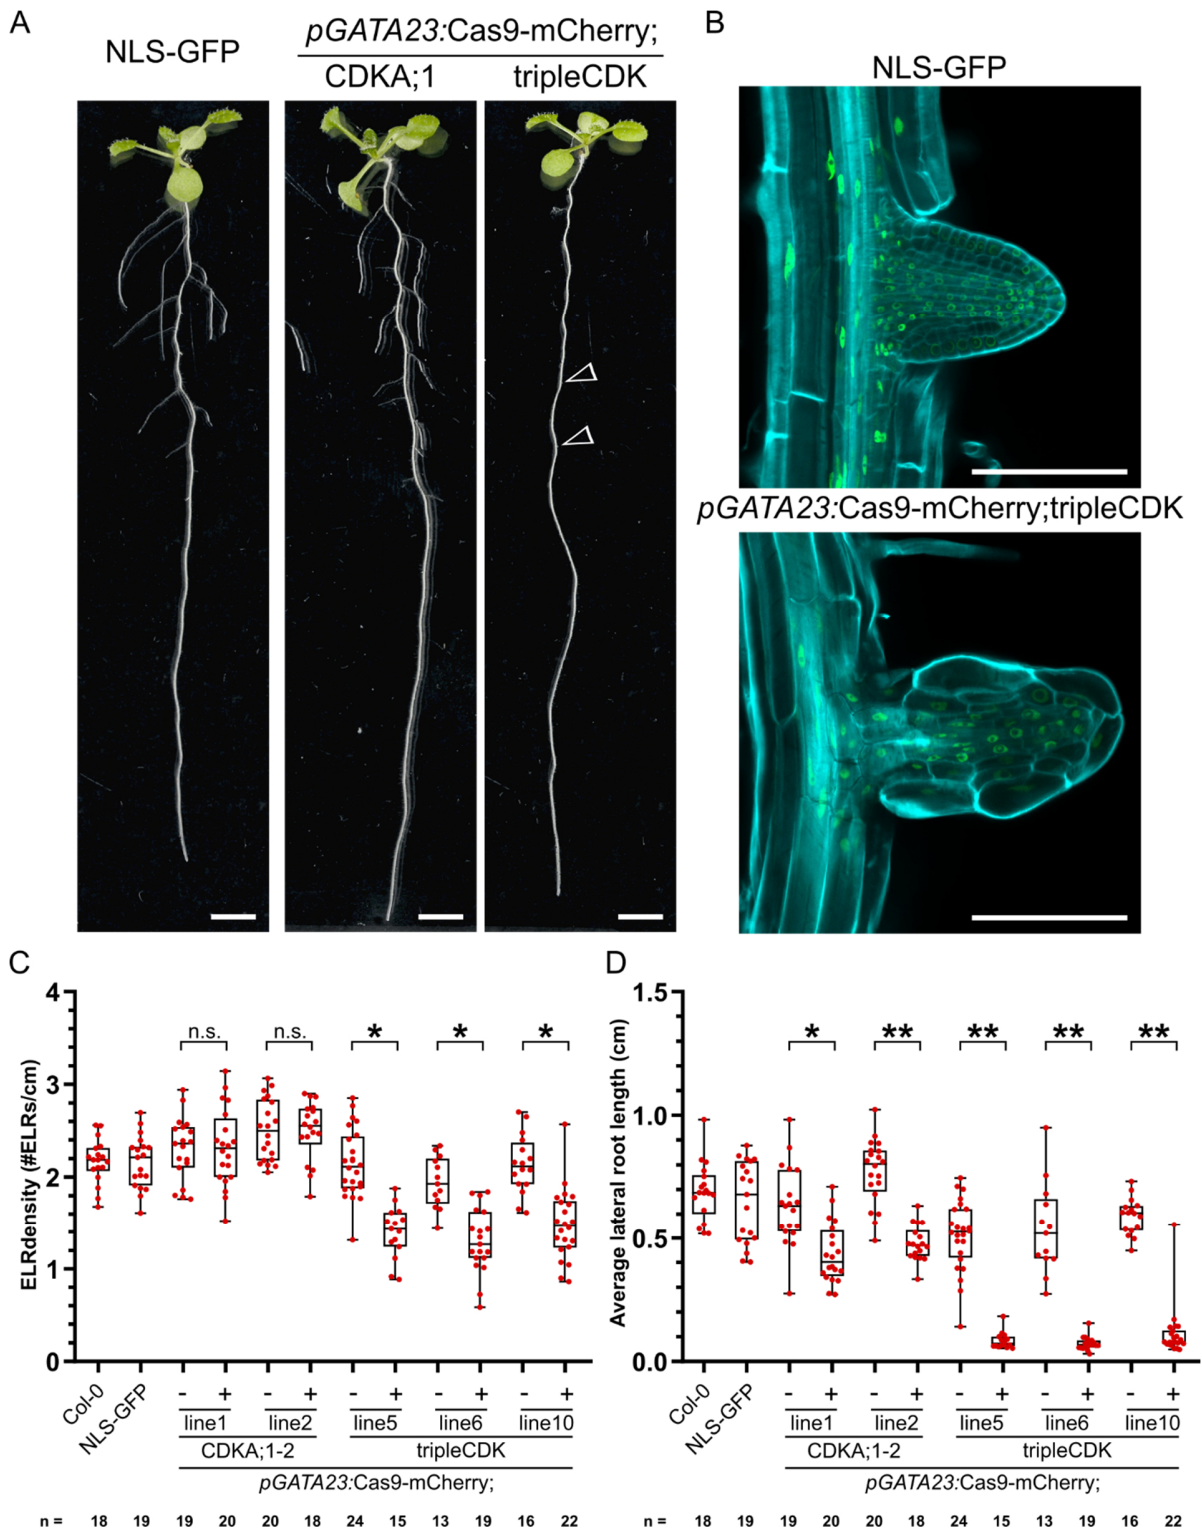

448

449

450

**Figure 5: Lateral root-specific gene knockout of cell cycle regulators using *pGATA23*-CRISPR-TSKO**

451 **A**, Representative 12 day old seedlings of NLS-GFP, T2 seedling of *pGATA23:Cas9-mCherry;CDKA;1-2*,  
452 and T2 seedling of *pGATA23:Cas9-mCherry;CDKA;1-2,CDKB1-1* (tripleCDK). Arrowheads show emerged  
453 lateral roots with an extremely reduced cell number. Scale bars represent 0.5cm. **B**, Confocal images of an  
454 emerged lateral root in NLS-GFP and *pGATA23:Cas9-mCherry;tripleCDK*. GFP in green, and cell wall  
455 stained with calcofluor white displayed in cyan. Scale bars represent 100  $\mu$ m. **C**, Quantification of the  
456 emerged lateral root (ELR) density of Col-0, NLS-GFP, and FAST negative (-) and positive (+) T2 seedlings  
457 of *pGATA23-CRISPR-TSKO* lines targeting either only *CDKA;1* or simultaneously *CDKA;1*, *CDKB1;1*, and  
458 *CDKB1;2*. ELR density was compared between FAST positive and negative seedlings within each line via  
459 Poisson regression analyses. n.s. indicates not significant with an  $\alpha=0.05$ . \* indicates *p* values smaller than  
460  $4 \times 10^{-4}$ . **D**, Quantification of average lateral root length of same seedlings as in C. A random effects model  
461 was used to estimate the effect of CRISPR-TSKO on the lateral root lengths between FAST positive and  
462 negative seedlings within each line. \* indicates *p* values smaller than  $6 \times 10^{-3}$ , \*\* indicates *p* values smaller  
463 than  $1 \times 10^{-4}$ .

464

## 465 Discussion

### 466 CRISPR-TSKO of essential genes enables their study in specific contexts

467 Targeted gene knockout experiments in plants typically have the objective of generating  
468 inheritable mutant alleles that will be transmitted to the offspring. The generation of such  
469 knockout lines is a powerful tool for the functional analysis of many genes of interest.  
470 However, this approach is difficult to apply to genes that are essential for cell survival,  
471 reproduction or those that have severe pleiotropic effects when mutated. Moreover,  
472 context-specificity of key regulators in developmental processes is often assumed by  
473 researchers, without experimental proof, while being aware of the non-context-specific  
474 expression. In this report we describe the design and validation of CRISPR-TSKO, a  
475 tissue-specific gene knockout approach in plants that can be used to overcome these  
476 limitations.

477 In total, we targeted nine genes using four different tissue-specific promoters. Several of  
478 the target genes (*PDS3*, *YDA*, *CDKA;1*) are essential for plant growth, development  
479 and/or reproduction. Mutations in *PDS3* induced by *pTMM:Cas9-mCherry;GFP-1;PDS3*  
480 led to the expected defects in chlorophyll content and chloroplast formation (Qin et al.,  
481 2007) specifically in the stomatal lineage. Importantly, the active photosynthetic mesophyll  
482 tissue was not markedly affected in non Cas9-expressing cells which allowed these plants  
483 to develop similarly as the wild-type. This stands in contrast to the ubiquitous CRISPR  
484 knockout plants that were primarily dwarfed, albino and not viable in soil (**Figure 3a**,  
485 **Supplementary File 6A**).

486 In wild-type *Arabidopsis*, chlorophyll-containing chloroplasts are formed in epidermal  
487 pavement cells as well as stomatal guard cells, though they are much smaller than  
488 mesophyll chloroplasts (Barton et al., 2016). The function of chloroplasts in guard cells  
489 has been the subject of debate (Lawson, 2009). Recently, the discovery of the *gles1*  
490 (*green less stomata 1*) mutant further supports the hypothesis that functional chloroplasts  
491 in guard cells are important for stomatal responses to CO<sub>2</sub> and light, resulting in stomatal  
492 opening (Negi et al., 2018). CRISPR-TSKO plants with mutated *PDS3*, or other genes  
493 required for chloroplast development and/or function, specifically in the stomatal lineage  
494 can be powerful tools to test these and other hypothesized functions of chloroplasts in  
495 guard cells.

496 The mitogen-activated protein kinase *YDA* has a plethora of roles during plant  
497 development including embryogenesis, epidermal patterning and root development  
498 (Musielak and Bayer, 2014; Smekalova et al., 2014). Accordingly, *yda* mutants have  
499 severe pleiotropic phenotypes. Already soon after fertilization, *yda* mutants fail to establish  
500 the first asymmetric division of the zygote and ensuing embryo development is severely  
501 compromised (Lukowitz et al., 2004). Some *yda* embryos do continue to develop into  
502 seedlings, but these rarely survive on soil and the few *yda* plants that flower are severely  
503 dwarfed and completely sterile (Bergmann et al., 2004; Lukowitz et al., 2004). While loss-  
504 of-function *yda* lines can be maintained in a heterozygous state, previous reports and our  
505 own experience show that only a small proportion of homozygous seedlings can be  
506 obtained either due to germination issues or very early seedling lethality (Lukowitz et al.,  
507 2004). This low recovery rate poses a considerable obstacle when designing and  
508 conducting experiments.

509 Using CRISPR-TSKO to target *YDA* only in the stomatal lineage, all transgenic events  
510 expressed a range of clustered-stomata phenotypes while other aspects of plant  
511 development were not notably compromised. Critically, all lines transferred to soil were  
512 fertile and we were able to generate normally-segregating T2 populations. These results  
513 demonstrate that by using CRISPR-TSKO we are able to uncouple the pleiotropic defects  
514 caused by *YDA* mutations to study its functions in the stomatal lineage.

515 The specific cellular defects caused by mutations in essential genes such as central cell  
516 cycle regulators are challenging to investigate due to lethality in the gametophyte or  
517 embryonic stage, and accordingly, low transmission rates (Nowack et al., 2012). CRISPR-  
518 TSKO enabled us to generate presumably higher-order *CDK* mutant lateral roots with  
519 striking cell proliferation defects on otherwise wild-type plants. These mutant plant lines  
520 offer a convenient opportunity to investigate the cellular defects caused by depletion of  
521 CDK proteins in an easily accessible tissue in the T1 or later transgenic generations.  
522 Interestingly, the cell proliferation in the stele of triple-CDK lateral roots appeared to be  
523 less affected than in the epidermis and cortex. Whether this is caused by differential  
524 turnover of CDK mRNA and/or proteins in different cell types, or by differential requirement  
525 of CDK activity in different tissues remains to be tested. Depletion of the *CDKA;1* target  
526 *RETINOBLASTOMA-RELATED1* (*RBR1*) has been shown to attenuate the cell  
527 proliferation defect in *cdka;1* mutants (Nowack et al., 2012), suggesting that tissue-  
528 specific differences of gene expression levels might contribute to a differential response  
529 to loss of CDK function. Alternatively, other CDK classes might be able to partly  
530 compensate for *CDKA* and *CDKB* loss of function in specific cell types (Inze and De  
531 Veylder, 2006). These different scenarios could be addressed by CRISPR-TSKO in the  
532 future. Similarly, many other central cell cycle or cell division regulators, of which no  
533 homozygous plants can be recovered, become amenable for detailed cellular  
534 investigation by CRISPR-TSKO.

### 535 **Generation of entire mutant organs with CRISPR-TSKO**

536 To generate entire mutant organs on otherwise wild-type plants we targeted primordial  
537 founder cells responsible for the generation of the root cap and whole lateral roots. The  
538 root cap is an organ that covers and protects the stem cells at the root tip. Although it has  
539 relatively low tissue complexity, it encompasses many aspects of plant development –  
540 generation by stem cells, proliferation, differentiation, and finally programmed cell death–  
541 in a compact spatial and temporal frame of a few hundred micrometers and a couple of  
542 days (Kumpf and Nowack, 2015). *SMB* is a key transcription factor required for root cap  
543 maturation and programmed cell death and its expression starts immediately after the  
544 formative stem cell division in root cap daughter cells (Willemsen et al., 2008; Fendrych



545 et al., 2014). We show that even an early acting gene such as *SMB* itself can be efficiently  
546 targeted thereby affecting root cap development. In this model system, the *pSMB*-  
547 CRISPR-TSKO vector toolkit could be particularly useful to study genes essential for basic  
548 cellular functions in this easily-accessible and nonessential root organ.

549 Lateral roots arise from a subset of stem cells situated in the pericycle at the xylem poles.  
550 These cells express *GATA23*, a gene that marks the onset of lateral root organogenesis  
551 and undergo tightly coordinated asymmetric cell divisions to generate cell diversity and  
552 tissue patterns, resulting in the development of a lateral root primordium (De Rybel et al.,  
553 2010). By targeting *GATA23*-expressing pericycle cells, we were able to generate plants  
554 with entirely mutated lateral roots. The generation of completely GFP-negative lateral  
555 roots in 87% of T1 events demonstrates the high efficiency of CRISPR-TSKO under  
556 *pGATA23*. Having a promoter at hand that is activated in the precursor cells of a new  
557 organ thus represents an effective means to generate whole organs devoid of the function  
558 of a gene of interest. Thus the use of CRISPR-TSKO may be an attractive alternative to  
559 grafting in certain experimental systems. Moreover, essential genes for primary root  
560 development such as *MONOPTEROS* hinder loss-of-function analysis during lateral root  
561 development (De Smet et al., 2010). The *pGATA23*-CRISPR-TSKO will enable us to  
562 uncouple the function of such genes involved in primary and lateral root development.

563 Auxin signaling is essential for lateral root initiation and development. The auxin response  
564 factors *ARF7* and *ARF19* are required for the auxin-induced pericycle cell divisions that  
565 constitute a lateral root initiation event. These divisions are strongly inhibited in *arf7arf19*  
566 double knockout mutants, which hardly produce any lateral roots (Okushima et al., 2007;  
567 Lavenus et al., 2013). *ARF7* is expressed in the initials of the vasculature and pericycle  
568 cells starting from the elongation zone, while *ARF19* is much more broadly expressed in  
569 the primary root (Okushima et al., 2005; Rademacher et al., 2011). Given their expression  
570 beyond the cells that actually contribute to lateral root formation, it has so far remained  
571 unresolved whether or not the role of *ARF7* and *ARF19* in lateral root initiation depends  
572 strictly on their activity in xylem-pole pericycle cells. Interestingly, targeted mutagenesis  
573 of *ARF7* and *ARF19* using the *pGATA23* does not result in a strong inhibition of lateral  
574 root initiation as observed in *arf7arf19* seedlings (**Figure 4C**).

575 This suggests that the function of ARF7 and ARF19 in lateral root precursor cells is not  
576 essential for lateral root development, and that their activity is required before the initiation  
577 of lateral root organogenesis and thus prior to the activation of *pGATA23*, or even in  
578 another tissue. This raises the question of when and in which cells of the primary root  
579 these ARFs are necessary for lateral root development. Alternatively, the ARF7/ARF19  
580 mRNA and/or protein may persist in *GATA23*-expressing cells long enough to promote  
581 lateral root initiation. To test these hypotheses, we will be able to utilize CRISPR-TSKO  
582 with different promoters with unique spatio-temporal expression patterns. Furthermore,  
583 the use of fluorescently-tagged translational fusion ARF7/ARF19 lines will allow us to track  
584 their depletion upon CRISPR-TSKO targeting and establish the precise developmental  
585 window of ARF7/ARF19 signaling necessary for lateral root initiation.

#### 586 **CRISPR-TSKO; A powerful and versatile tool**

587 We developed a modular vector-cloning scheme based on the GreenGate system  
588 (Lampropoulos et al., 2013) to facilitate the construction of CRISPR-TSKO reagents. The  
589 modularity of the cloning system allows for the rapid assembly of new promoter sequences  
590 with Cas9 or any nuclease of choice. To further enable the use of this technology, we  
591 have developed a Cas9-P2A-mCherry;GFP-1 destination vector (pFASTR-Bsal-*CmR*-  
592 *ccdB*-Bsal-Cas9-P2A-mCherry-G7T-AtU6-GFP-1) with an empty promoter module  
593 containing a *ccdB/CmR* cassette flanked by Bsal restriction sites. Any promoter in a  
594 GreenGate entry vector can be inserted into this destination vector with a single Golden  
595 Gate reaction and researchers can immediately test the suitability of their promoter for  
596 CRISPR-TSKO in a GFP-expressing background line. Targeting specifically in spatial and  
597 temporal contexts can also be readily achieved with the inducible and tissue-specific plant  
598 expression systems that utilize GreenGate technology (Schurholz et al., 2018).

599 The cloning reagents used here are inexpensive, require minimal hands-on time and can  
600 be readily adopted by any laboratory. The system can currently accommodate up to twelve  
601 gRNAs by the use of an AarI linker and additions of six paired-gRNA entry modules  
602 (**Supplementary File 2 and Supplementary Methods**). By recycling the AarI-linker it is  
603 possible to clone even more gRNAs. For ease of use, a workflow was developed to  
604 substitute the AarI restriction sites in the linker for Bsal restriction sites flanking the *ccdB*

605 and *CmR* selectable markers (**Figure 1, Supplementary File 2, and Supplementary**  
606 **Methods**). This strategy avoids the need for separate AarI digestions of regularly-used  
607 destination vectors and provides a negative selection marker for the original destination  
608 vector in *ccdB*-sensitive *Escherichia coli* cells (e.g. DH5 $\alpha$ ). Alternatively, additional  
609 expression cassettes can be sequentially inserted into the AarI-*SacB* or BsaI-*ccdB* linkers.  
610 Hence, the system presented here can be easily used and modified for a variety of  
611 genome engineering applications such as transcriptional regulation (Lowder et al., 2015)  
612 and base editing (Marzec and Hensel, 2018).

### 613 **Considerations for use of CRISPR-TSKO**

614 One general characteristic of CRISPR-TSKO is the continuous *de-novo* generation of  
615 mutations in cells that start to express Cas9. In the case of the root cap, every newly-  
616 generated root cap cell starting to express SMB can create a novel gene knockout event.  
617 In the stomatal lineage, every cell that starts expressing TMM or FAMA generates  
618 independent lineages, and in the case of the lateral root, every *GATA23*-expressing  
619 founder cell will contribute individual mutations to the lateral root primordium (von  
620 Wangenheim et al., 2016). Therefore, unlike in ubiquitous, inheritable mutant approaches,  
621 no defined mutant alleles are generated. Most mutations are small (1-3 bp) indels causing  
622 frame shifts and early stop codons, but, depending on the gRNA, some will also lead to  
623 in-frame missense mutations. Despite this source of variation, we are able to observe  
624 knockout phenotypes of varying degrees for all of the genes investigated. Furthermore,  
625 DNA repair outcomes from Cas9-mediated cleavage are non-random (Allen et al., 2019).  
626 Indeed, mutation analysis of the CRISPR-TSKO events show that gRNAs largely give the  
627 same indel spectrum regardless of the tissue-specific promoter used. For example, the  
628 most common indel generated for the GFP-1 target locus in *SMB*-, *TMM*-, *FAMA*-, and  
629 *GATA23*-expressing cells is a 1-bp insertion followed by 1- and 3-bp deletions  
630 (**Supplementary Files 5, 9, 10, and 14**).

631 Some gRNAs do not induce mutations with a high efficiency. The ARF7-1 and ARF19-1  
632 gRNAs are a clear example of this, with ARF7-1 giving indel frequencies of 20-60% and  
633 ARF19-1 giving only 3-13%. These low indel frequencies are the most likely reason for  
634 the lack of a lateral root phenotype in the ubiquitously-expressed Cas9 T1 plants. Based

635 on this, and that indel outcomes are non-random, we recommend that users of CRISPR-  
636 TSKO initially generate multiple gRNAs to target genes of interest as we have done in  
637 most of the experiments reported here. In cases where the targeted cells will be of low  
638 abundance (only a few cells targeted, e.g. *pSMB*, or knockout of essential genes, e.g.  
639 *CDKA;1*) and it would therefore be practically challenging to obtain sufficient material for  
640 genotyping, controlling Cas9 expression with a ubiquitous promoter such as *PcUbi* or  
641 *GATA23* (to make mutant lateral roots) is a reasonable way to test the efficiency of a  
642 gRNA. This experiment can also establish whether or not a gene is essential when an  
643 efficient gRNA is identified.

644 Users should also consider targeting functional domains as is generally recommended  
645 with any standard knockout strategy. For example, the gRNA GFP-1 used here targets  
646 the essential Gly67 residue for GFP fluorescence, so that even in-frame mutations result  
647 in a loss of fluorescence (Fu et al., 2015). Hence, gRNAs targeting genes of interest in  
648 particularly sensitive sites, such as crucial interaction domains or active sites, can further  
649 increase the likelihood of CRISPR-TSKO being effective.

650 We observed a strong correlation between gene knockout and Cas9-mCherry expression,  
651 which can be used to facilitate event selection. Furthermore, targeting of *GFP* alongside  
652 a gene of interest in a ubiquitously-expressing NLS-GFP background revealed that  
653 knockout of GFP strongly correlated with mutagenesis of the endogenous genes *SMB*  
654 and *PDS3*. Thus, both tagged Cas9 as well as knockout of reporter genes facilitate the  
655 selection of successful knockout events in tissues and organs. Moreover, the efficiency of  
656 new promoter sequences to drive expression of Cas9 can be evaluated by using both the  
657 gRNA GFP-1 and the NLS-GFP background plant line as used here. While loss of GFP  
658 signal should not be taken as definitive proof that the function of a gene of interest is also  
659 lost, it allows for an easy readout when testing CRISPR-TSKO in new cell types and  
660 developmental contexts.

### 661 **Limitations of CRISPR-TSKO**

662 Depending on the promoter used or gene targeted, CRISPR-TSKO experiments might not  
663 always be straightforward. This is illustrated with our use of the *pFAMA* promoter  
664 sequence. While we initially were unable to observe an obvious microscopic phenotype

665 when targeting *GFP* and *PDS3*, we did observe a reduced GFP signal by flow cytometry  
666 for one transgenic line and DNA mutations were detected in all four sorted lines.  
667 Therefore, Cas9 expression in these cells led to DNA mutations (albeit, at a lower  
668 frequency than other experiments), but conferred only a modest phenotypic effect. If the  
669 generation of indels are independent events and given the indel frequencies we observed  
670 (23-75%; **Supplementary File 10**), we would expect ~5-56% of the guard cells to be  
671 knocked out for GFP. However, guard cells completely lacking GFP expression were not  
672 observed in our *pFAMA* experiments. In our experiments with the *pSMB*, residual GFP  
673 fluorescence is detectable in the two youngest root cap layers, with some overlap between  
674 mCherry and GFP signals (**Figure 2A,B**). Therefore, we hypothesize that mRNA and/or  
675 protein turnover is required before knockout phenotypes can be observed. The speed of  
676 these processes likely depends of the stability of the particular mRNA and protein, and,  
677 considering our *pFAMA* observations, might also depend on the cell type in question.

678 The negative results presented here highlight that these dynamics should be considered  
679 on a gene-by-gene and tissue-specific promoter basis when designing and analyzing  
680 CRISPR-TSKO experiments. Therefore, ideally more than one promoter should be  
681 evaluated when targeting novel cell types with CRISPR-TSKO before more labor-  
682 intensive phenotyping is performed for genes of interest. This test can simply be  
683 performed by analyzing the ubiquitously expressing NLS-GFP line transformed with the  
684 highly efficient gRNA GFP-1 under the control of a new promoter of choice. Alternatively,  
685 translational fluorescent fusion lines can be used to monitor the elimination of a protein of  
686 interest from a particular cell type.

687 In conclusion, cell type-, tissue-, or organ-specific gene knockout by targeted expression  
688 of Cas9 is a powerful means of functional genetic analysis in specific spatial and temporal  
689 contexts of plant development. This is especially true for genes that are widely expressed  
690 or have fundamental roles for cell survival or plant reproduction. CRISPR-TSKO allows  
691 for the rapid generation of stable transgenic lines with *de novo* somatic DNA mutations  
692 specifically to the cell, tissue or organ of interest. Due to its flexibility and ease of use, we  
693 foresee this tool as enabling the discovery of context-specific gene functions. Moreover,  
694 the scalability of the system allows for quick initial investigation of candidate genes with

695 the reduced influence of pleiotropic effects. As with other CRISPR applications, CRISPR-  
696 TSKO is forward-compatible to incorporate upcoming future variations of CRISPR gene  
697 modification. Together with the virtually unlimited possibilities to combine different  
698 promoters, reporters, or tags in CRISPR-TSKO, this technology presents a powerful  
699 addition to the molecular genetics tool-box for plant biology research.

## 700 **Distribution of modules, plasmids, and protocols**

701 All cloning modules and plasmids reported here are available via the VIB-UGent Center  
702 for Plant Systems Biology Gateway Vector website (**Supplementary File 3**;  
703 <https://gateway.psb.ugent.be/search>) or via Addgene (<https://www.addgene.org/>). See  
704 **Supplementary methods** for detailed cloning protocols.

705 Seeds for the *pHTR5:NLS-GUS-GFP* line are available upon request.

## 706 **Methods**

### 707 **Cloning**

708 All cloning reactions were transformed via heat-shock transformation into *ccdB*-sensitive  
709 DH5 $\alpha$  *E. coli* or One Shot™ *ccdB* Survival™ 2 T1R Competent Cells (ThermoFisher  
710 Scientific). Depending on the selectable marker, the cells were plated on LB medium  
711 containing 100  $\mu$ g/mL carbenicillin, 100  $\mu$ g/mL spectinomycin, 25  $\mu$ g/mL kanamycin or 10  
712  $\mu$ g/mL gentamycin. Colonies were verified via colony-touch PCR, restriction digest and/or  
713 Sanger sequencing by Eurofins Scientific using the Mix2Seq or TubeSeq services. All  
714 cloning PCR reactions were performed with either Q5® High-Fidelity DNA Polymerase  
715 (New England Biolabs) or iProof™ High-Fidelity DNA Polymerase (BioRad Laboratories).  
716 Gibson assembly reactions were performed using 2x NEBuilder Hifi DNA Assembly Mix  
717 (New England Biolabs). Column and gel purifications were performed with Zymo-Spin™  
718 II columns (Zymo Research).

### 719 *Golden Gate entry modules*

720 Golden Gate entry modules were made by PCR amplification of gene fragments and  
721 inserting the purified PCR product into Bsal-digested GreenGate entry vector  
722 (Lampropoulos et al., 2013) via restriction-ligation using Bsal (New England Biolabs) or

723 Gibson assembly. See **Supplementary File 22** for all primers used. All generated clones  
724 were verified via Sanger sequencing.

725 The coding sequence for mTagBFP2, based on a previously reported mTagBFP2 (Pasin  
726 et al., 2014), was PCR amplified with primers RB42 and RB43 from a synthesized  
727 fragment (Gen9) and inserted into a Bsal-digested pGGC000 plasmid via ligation.

728 The unarmed gRNA modules were cloned by amplifying the AtU6-26 promoter and gRNA  
729 scaffold from previously-described Golden Gate entry vectors (Houbaert et al., 2018). The  
730 amplification was done using the forward primer 120 and the reverse primers 283, 284,  
731 230, 231, 232 and 233 for the B to G overhangs, respectively. This removed an unwanted  
732 attB2 site. PCR products were digested with Bsal and ligated into the respective empty  
733 entry vectors. The unarmed gRNA modules were further adapted by adding the *ccdB*  
734 negative selectable marker. The *ccdB* gene was PCR amplified from pEN-L1-AG-L2 with  
735 oligos 391 and 392 and inserted into BbsI-digested unarmed gRNA modules via Gibson  
736 assembly. pGG-F-AtU6-26-Aarl-Aarl-G was made by annealing oligos 345 and 346, and  
737 ligating these into the BbsI-digested vector pGG-F-AtU6-26-BbsI-Bbs-G.

738 The linker modules for Golden Gate were constructed as previously described (Houbaert  
739 et al., 2018). The entry module pGG-F-A-Aarl-Aarl-G-G was made by annealing oligos  
740 361 and 362, and ligating into the Bsal-digested entry vector pGGF000. The variable linker  
741 pGG-F-A-Aarl-SacB-Aarl-G-G, based on the SacB sequence from pMA7-SacB (Lennen  
742 et al., 2016), was synthesized on the BioXP3200 DNA synthesis platform (SGI-DNA) and  
743 inserted into a Bsal-digested pGGF000 plasmid via Gibson assembly.

744 The variable linker modules were made by PCR-amplifying the Aarl-SacB fragment from  
745 pGG-F-A-Aarl-SacB-Aarl-G-G with the respective primers 1589-1600 (Supplementary  
746 Table 3). PCR products were gel purified and inserted via Gibson assembly into pGG-A-  
747 m43GW-B (*unpublished*) pre-digested with ApaI and SacI. Clones were verified with oligo  
748 1658.

749 *GATEWAY<sup>TM</sup> destination vectors*

750 pGG-A-pOLE1-B, pGG-B-OLE1-C, pGG-D-linker-E (Lampropoulos et al., 2013), pGG-E-  
751 NOST-F and pGG-F-LinkerII-G were assembled with either pGG-C-mRuby3-D or pGG-

752 C-GFP-D (Lampropoulos et al., 2013) into pEN-L1-A-G-L2. The ligation reactions were  
753 used as templates for PCR with the primers 195 and 196. The PCR products were cloned  
754 via Gibson assembly into pGGK7m24GW (Karimi et al., 2005) linearized with KpnI and  
755 XbaI. Clones were verified by Sanger sequencing. The resulting vectors containing the  
756 red and green fluorescent FAST markers were named pFASTRK24GW and  
757 pFASTGK24GW, respectively.

#### 758 *Proof-of-concept vectors*

759 The Golden Gate entry modules pGG-A-*pSMB*-B, pGG-B-Linker-C, pGG-C-Cas9PTA\*-D,  
760 pGG-D-Linker-E, pGG-E-G7T-F and pGG-F-linkerII-G were assembled in pEN-L4-AG-R1  
761 (Houbaert et al., 2018), resulting in the vector pEN-L4-*pSMB*-Cas9PTA-G7T-R1. The  
762 Golden Gate entry module pGG-A-AtU6-26-BbsI-BbsI-B and pGG-B-linkerII-G were  
763 assembled in pEN-L1-A-G-L2 (Houbaert et al., 2018), resulting in the vector pEN-L1-  
764 AtU6-26-BbsI-BbsI-L2. The BbsI restriction sites were swapped with a fragment  
765 containing the *ccdB* and *CmR* selectable markers flanked with BsaI sites. This fragment  
766 was PCR amplified from the plasmid pEN-L4-A-G-R1, using primers 1436 and 1437. The  
767 fragment was BsaI-digested and ligated with T4 DNA Ligase in the BbsI-digested vector  
768 pEN-L1-AtU6-26-BbsI-BbsI-L2, resulting in the vector pEN-L1-AtU6-26-BsaI-BsaI-L2.  
769 pEN-L4-*pSMB*-Cas9PTA-G7T-R1 and pEN-L1-AtU6-26-BsaI-BsaI-L2 were recombined  
770 in pGGB7m24GW (Karimi et al., 2005) via a MultiSite Gateway reaction according to  
771 manufacturer's recommendations. This vector was called pB-*pSMB*-Cas9-G7T-AtU6-  
772 BsaI-BsaI-gRNA scaffold.

773 Oligos 138 and 139 (GFP-1 target) and oligos 134 and 135 (GFP-2 target) were annealed  
774 by adding 1  $\mu$ L of each 100  $\mu$ M oligonucleotide in 48  $\mu$ L of MQ and incubating with a slow  
775 cooling program on the thermal cycler (5 minutes at 95°C; 95-85°C, -2°C/second; 85-  
776 25°C, -0.1°C/second). These annealed oligonucleotides were cloned via a Golden Gate  
777 reaction into pB-*pSMB*-Cas9-G7T-AtU6-BsaI-BsaI-gRNA scaffold. The Golden Gate  
778 reaction conditions are described in **Supplementary Methods**. The resulting vectors  
779 were named pB-*pSMB*-Cas9-G7T-AtU6-GFP-1 and GFP-2.

#### 780 *Golden Gate destination*



781 The Golden Gate destination vectors were cloned by amplifying the *CmR* and *ccdB*  
782 selection cassettes, flanked by the Golden Gate cloning sites A-G, from pEN-L1-AG-L2  
783 using primers 298 & 313. PCR products were column purified and cloned via Gibson  
784 assembly in the HindIII and PstI linearized Gateway destination vectors pGGP7m24GW,  
785 pGGK7m24GW, pGGB7m24GW, pGGPH7m24GW (Karimi et al., 2005),  
786 pFASTRK24GW and pFASTGK24GW. The resulting vectors were named respectively  
787 pGGP A-G, pGGK A-G, pGGB A-G, pGGH A-G, pFASTRK A-G, pFASTGK A-G. All  
788 clones were verified by Sanger sequencing and diagnostic digest with NotI.

789 To generate the pFASTR-A-G destination vector, the Golden Gate entry modules pGG-  
790 A-pOLE1-B, pGG-B-OLE1-C, pGG-C-mRuby3-D, pGG-D-Linker-E, pGG-E-NOST-F,  
791 pGG-F-linkerII-G were assembled in pGGP-A-G. Subsequently the *CmR* and *ccdB*  
792 selection cassettes, flanked by the Golden Gate cloning sites, were PCR amplified using  
793 primers 298 and 430 from pEN-L1-AG-L2 and inserted via Gibson assembly.

#### 794 *One-step CRISPR-TSKO cloning vectors*

795 For cloning two gRNAs in a destination vector, we followed a similar approach as  
796 previously described (Xing et al., 2014), with some modifications. A plasmid was  
797 generated to serve as a PCR template for 2-gRNA vectors. The Golden Gate entry  
798 modules pGG-A-AtU6-26-BbsI-BbsI-B, pGG-B-Linker-C (Lampropoulos et al., 2013),  
799 pGG-B-AtU6PTA-C (Houbaert et al., 2018) and pGG-D-linkerII-G were assembled in  
800 pEN-L1-A-G-L2 to generate pEN-2xAtU6 template. The clone was verified by Sanger  
801 sequencing.

802 The extended protocol for making one-step, CRISPR-TSKO cloning vectors can be found  
803 in **Supplementary Methods**. In summary, six different entry modules are combined via  
804 Golden Gate assembly in a destination vector. The A-B entry module contains the tissue-  
805 specific promoter, the C-D module contains the Cas9 endonuclease and can be combined  
806 with an N-terminal tag (B-C) or C-terminal tag (D-E), and the E-F entry module contains  
807 the terminator. For making a vector that is compatible with cloning one or two gRNAs, the  
808 F-G module pGG-F-AtU6-26-AarI-AarI-G is used (**Figure 1**). Upon digestion with AarI,  
809 this vector can be loaded directly with one or two gRNAs. Alternatively, the AarI sites can  
810 be replaced for a fragment containing BsaI sites flanking the *ccdB* and *CmR* selectable

811 markers. Two gRNAs can be cloned via a PCR reaction on the pEN-2xAtU6 template  
812 using primers that contain gRNA spacer sequences via a Golden Gate reaction. More  
813 details can be found in **Supplementary Methods**.

814 For making a vector that is compatible with multiple gRNA's (up to 12) the Golden Gate  
815 cloning is slightly modified. The initial Golden Gate reaction is performed with an F-G  
816 linker containing AarI restriction sites (**Supplementary File 2**). Upon AarI digestion, this  
817 vector can be directly loaded with six Golden Gate entry modules containing one or two  
818 AtU6-26 promoters and gRNAs. Alternatively, a similar strategy to replace the AarI sites  
819 by the *ccdB* and *CmR* selectable markers flanked with BsaI sites can be followed. All  
820 gRNA target sequences are in **Supplementary File 23**.

#### 821 *Expression vector with an empty promoter module*

822 The armed gRNA module pGG-F-AtU6-26-GFP-1-G was made by annealing oligos 138  
823 and 139 (GFP-1 target), and ligating these via a Golden Gate reaction in pGG-F-AtU6-26-  
824 BbsI-ccdB-BbsI-G. The entry modules pGG-A-AarI-SacB-AarI-B, pGG-B-Linker-C, pGG-  
825 C-Cas9PTA\*-D, pGG-D-P2A-mCherry-NLS-E, pGG-E-G7T-F and pGG-F-AtU6-26-GFP-  
826 1-G were cloned into pFASTR A-G via a Golden Gate reaction. This vector was digested  
827 with AarI and the upper band was gel purified. The PCR product of the reaction on pEN-  
828 L4-AG-R1 using oligos 1879 and 1880, was cloned into the AarI-digested fragment using  
829 Gibson assembly. The resulting vector, pFASTR-BsaI-CmR-ccdB-BsaI-Cas9-P2A-  
830 mCherry-G7T-AtU6-GFP-1, was verified by restriction digest using PvuII and sequencing.  
831 Entry modules containing a promoter can easily be cloned in this vector via a Golden Gate  
832 reaction.

#### 833 **Plant lines used in this study**

834 The *smb-3* line is derived from the SALK collection (SALK\_143526C). The NLS-GFP line  
835 (pHTR5:NLS-GUS-GFP) was previously reported (Ingouff et al., 2017). The *arf7 arf19*  
836 double mutant (Okushima et al., 2005) is derived from the ABRC collection (CS24629).  
837 The *yda-1* mutant was previously reported (Lukowitz et al., 2004).

#### 838 **Plant transformation**

839 Plant vectors were transformed in *Agrobacterium tumefaciens* C58C1 by electroporation.  
840 Transformation in pHTR5:NLS-GUS-GFP was performed via the floral dip method  
841 (Clough and Bent, 1998). For constructs containing the bar selectable marker, the T1 seed  
842 selection was done on 1/2 MS medium + 10 mgL<sup>-1</sup> Glufosinate-ammonium (Sigma-  
843 Aldrich). For construct containing the FASTR screenable marker, the T1 transgenic seeds  
844 were selected under a Leica M165FC fluorescence stereomicroscope. Resistant  
845 seedlings or FASTR-positive seeds were transferred to Jiffy-7 pellets® and grown in a  
846 greenhouse at 21°C under a 16-hour day regime.

#### 847 **DNA extraction and molecular analysis**

848 Seedling, leaves or roots were frozen and disrupted to powder using a TissueLyser  
849 (Retsch MM300). DNA was extracted using a modified version of the protocol from  
850 Edwards et al. (Edwards et al., 1991). The modifications consisted of an adapted  
851 extraction buffer (100 mM Tris HCl pH 8.0, 500 mM NaCl, 50 mM EDTA, 0.7% SDS) and  
852 a 70% ethanol washing step before dissolving the pellet. A region around the  
853 CRISPR/Cas9 target site was PCR amplified using the ALLin™ Red Taq Mastermix, 2X  
854 (highQu GmbH) with the following program on the thermocycler: 95°C for 3 minutes,  
855 followed by 33 cycles (30 seconds at 95°C, 30 seconds at the annealing temperature, 1  
856 minute/kb at 72°C), 72°C for 5 minutes. The PCR products were analyzed via agarose gel  
857 electrophoresis and the clean-up was either done by bead purification with HighPrep™  
858 PCR (MAGBIO) or column purification with the DNA Clean & Concentrator™ kit (Zymo  
859 Research). The purified samples were send for Sanger sequencing (Eurofins Scientific)  
860 and analyzed using TIDE (version 2.0.1) (Brinkman et al., 2014).

#### 861 **Confocal microscopy for original proof of concept**

862 T1 seedlings were imaged on a Zeiss LSM710 confocal microscope. GFP was excited at  
863 488 nm and acquired between 500-550 nm. T2 seedlings were imaged on a Leica SP8X  
864 confocal microscope. GFP was excited at 488 nm and acquired between 500-530 nm.

#### 865 **Confocal microscopy**

866 Seedlings were imaged on a Leica SP8X confocal microscope. For root imaging, GFP  
867 was excited at 488 nm and acquired between 500-530nm. mCherry was excited at 594

868 nm and acquired between 600-650nm. Samples were either stained with 20 µg/mL DAPI  
869 or with 10 µg/mL propidium iodide in 0.43 gL<sup>-1</sup> Murashige and Skoog salts with 94 µM  
870 MES.H<sub>2</sub>O medium. DAPI was excited at 405 nm and acquired between 410-480 nm in  
871 sequential mode.

872 For stomata imaging, cotyledons were vacuum infiltrated with 20 µg/mL of DAPI in 0.43  
873 gL<sup>-1</sup> Murashige and Skoog salts with 94 µM MES.H<sub>2</sub>O medium. Samples were imaged in  
874 sequential mode. DAPI was excited at 405 nm and acquired between 410-450 nm. GFP  
875 was excited at 488 nm and acquired between 500-530 nm. mCherry was excited at 594  
876 nm and acquired between 600-650 nm. Chlorophyll fluorescence was excited at 488 nm  
877 and acquired between 680-730 nm. Images were analyzed using Fiji (Schindelin et al.,  
878 2012).

879 To image lateral root primordia, seedlings were cleared using the ClearSee protocol  
880 (Kurihara et al., 2015; Ursache et al., 2018) in combination with cell wall staining using  
881 Calcofluor White M2R (Sigma) on a Leica SP8X confocal microscope. Calcofluor White  
882 was excited at 405 nm and acquired between 430-470 nm. GFP was excited at 488 nm  
883 and acquired between 500-525 nm. mCherry was excited at 594 nm and acquired  
884 between 600-630 nm.

### 885 **Epifluorescence microscopy**

886 Cotyledons of FASTR positive seedlings were mounted on distilled water and observed  
887 on a Zeiss Observer.Z1 using a Plan-Apochromat 20x/0.8 DICII objective. GFP  
888 fluorescence was observed with a BP 470/40 filter for excitation, a FT 495 beam splitter,  
889 and a BP 525/50 emission filter. mCherry was observed with a BP 545/25 filter for  
890 excitation, a FT 570 beam splitter, and a BP 605/70 emission filter.

### 891 **Segmentation and analysis of root cap nuclei**

892 Root tip image stacks were segmented and nuclei intensity measurements performed  
893 using the interactive learning and segmentation toolkit ilastik 1.3.0 (Sommer et al., 2011).  
894 Intensity of GFP and mCherry were measured for segmented nuclei with a probability  
895 equal or higher than 0.95 of belonging to root cap cells. Based on mCherry measurements

896 in the NLS-GFP line (**Supplementary File 24**), a threshold of 25 was established as a  
897 minimum signal for mCherry.

### 898 **Protoplast preparation and cell sorting**

899 Protoplasting was performed as previously described (Bargmann and Birnbaum, 2010).  
900 Briefly, for *pSMB*-CRISPR-TSKO lines, root tips of 5 day old seedlings grown under  
901 continuous light on 0.43 gL<sup>-1</sup> Murashige and Skoog salts with 94 μM MES.H<sub>2</sub>O medium  
902 were incubated in protoplasting solution consisting of 1.25% cellulase (Yakult, Japan),  
903 0.3% Macerozyme (Yakult, Japan), 0.4 M mannitol, 20 mM MES, 20 mM KCl, 0.1% BSA  
904 and 10 mM CaCl<sub>2</sub> at pH 5.7 for 3 hours. Samples were then filtered through a 40 μm filter  
905 and the flow through centrifuged at 150xg for 10min. Supernatant was discarded and  
906 protoplasts were recovered in ice-cold resuspension buffer. Resuspension buffer was of  
907 same constitution as protoplasting buffer with the omission of both cellulase and  
908 macerozyme. For lines targeting stomatal lineages, cotyledons of 5-day old seedlings  
909 were processed as above but with a 12 hours incubation time to get proper release of  
910 guard cells.

911 Root tip protoplasts were sorted into 1.5 ml Eppendorf tubes containing 500 μl of  
912 resuspension buffer using a BD FACSAriaII, equipped with 3 lasers (405 nm, 488 nm and  
913 633 nm). To account for the double presence of GFP and mCherry in some samples, the  
914 cotyledon protoplasts were sorted into 1.5 ml Eppendorf tubes containing 500 μl of  
915 resuspension buffer using a BD FACSMelody, equipped with 3 lasers (405 nm, 488 nm  
916 and 561 nm). The 561 nm laser in the BD FACSMelody made a better separation possible  
917 due to a better excitation of the mCherry. All FACS sorting reports can be found in  
918 **Supplementary Files 8 and 11**.

### 919 **Quantification of lateral root density**

920 Seeds were sown on half-strength Murashige and Skoog (MS) medium (Duchefa  
921 Biochemie B.V.), supplemented with 1% (w/v) sucrose and 0,8% (w/v) agar, at pH 5,7 and  
922 stratified for 2 days in the dark at 4°C. Seedlings were grown vertically for 12 days in  
923 continuous light (100 μmol m<sup>-2</sup>s<sup>-1</sup>) at 22°C. Presence/absence of Cas9-mCherry signal  
924 was scored using a Leica M165FC fluorescence stereomicroscope. The number of

925 emerged lateral roots was determined for every seedling using a stereo microscope and  
926 root lengths were measured via Fiji (ImageJ 1.52n) (Schindelin et al., 2012) using digital  
927 images obtained by scanning the petri dishes.

### 928 **Stomata analysis of cotyledons in *YDA* targeting lines**

929 The cotyledon epidermis of seedlings 10 days post germination was visualized by clearing  
930 cotyledons in 100% ethanol and incubation at 60 degrees in 90% ethanol / 10% acetic  
931 acid for 30 minutes and ethanol / 1,25 M sodium hydroxide (1:1 v/v) for 2 hours. Next,  
932 cotyledons were incubated overnight at room temperature in lactic acid saturated with  
933 chloral hydrate, washed in 100% lactic acid and mounted for differential interference  
934 contrast microscopy (Olympus BX51). Images (430  $\mu\text{m}$  x 566  $\mu\text{m}$ ) from the midline to the  
935 margin on abaxial surfaces were generated. Thirty five to 40 cotyledons of individual  
936 seedlings were evaluated per genotype.

### 937 **Statistical analysis**

938 For segmentation and analysis of root cap nuclei, Spearman's Correlation Coefficient  
939 between median root cap signal of GFP and mCherry was calculated using SAS (Version  
940 9.4, SAS Institute Inc., 2013 Cary, North Carolina). For the comparison of emerged lateral  
941 root densities, the number of emerged lateral roots was modelled by Poisson regression  
942 using the primary root length as an offset variable and genotype as fixed effect. In the  
943 presence of overdispersion, the negative binomial distribution was used instead of the  
944 Poisson distribution. The analysis was performed with the genmod procedure from SAS  
945 (SAS/STAT analytical product 14.3, SAS Institute Inc., 2017, Cary, North Carolina). Post-  
946 hoc comparison tests were done using the capabilities of the plm procedure. In case of  
947 multiple testing, P-values were adjusted using the Dunnett's method. For the comparison  
948 of lateral root lengths, a random effects model was used to estimate the effect within each  
949 line. The root length was log transformed to stabilize the variance. Numerator degrees of  
950 freedom for the type III test of effect were calculated according to Kenward-Rogers as  
951 implemented in the mixed procedure from SAS (Version 9.4, SAS Institute Inc., 2013 Cary,  
952 North Carolina). The assumptions were checked by residual diagnostics. The SAS code  
953 is available upon request.

## 954 **References**

- 955
- 956 **Ablain J, Durand EM, Yang S, Zhou Y, Zon LI** (2015) A CRISPR/Cas9 Vector System for Tissue-Specific  
957 Gene Disruption in Zebrafish. *Developmental Cell* **32**: 756-764
- 958 **Allen F, Crepaldi L, Alsinet C, Strong AJ, Kleshchevnikov V, De Angeli P, Palenikova P, Khodak A, Kiselev**  
959 **V, Kosicki M, Bassett AR, Harding H, Galanty Y, Munoz-Martinez F, Metzakopian E, Jackson SP,**  
960 **Parts L** (2019) Predicting the mutations generated by repair of Cas9-induced double-strand  
961 breaks. *Nature Biotechnology* **37**: 64-+
- 962 **Alvarez JP, Pekker I, Goldshmidt A, Blum E, Amsellem Z, Eshed Y** (2006) Endogenous and synthetic  
963 microRNAs stimulate simultaneous, efficient, and localized regulation of multiple targets in  
964 diverse species. *Plant Cell* **18**: 1134-1151
- 965 **Bargmann BOR, Birnbaum KD** (2010) Fluorescence Activated Cell Sorting of Plant Protoplasts. *JoVE*:  
966 e1673
- 967 **Barton KA, Schattat MH, Jakob T, Hause G, Wilhelm C, McKenna JF, Mathe C, Runions J, Van Damme D,**  
968 **Mathur J** (2016) Epidermal Pavement Cells of Arabidopsis Have Chloroplasts. *Plant Physiology*  
969 **171**: 723-726
- 970 **Bennett T, van den Toorn A, Sanchez-Perez GF, Campilho A, Willemsen V, Snel B, Scheres B** (2010)  
971 *SOMBRERO*, *BEARSKIN1*, and *BEARSKIN2* Regulate Root Cap Maturation in Arabidopsis. *Plant Cell*  
972 **22**: 640-654
- 973 **Bergmann DC, Lukowitz W, Somerville CR** (2004) Stomatal development and pattern controlled by a  
974 MAPKK kinase. *Science* **304**: 1494-1497
- 975 **Bortesi L, Fischer R** (2015) The CRISPR/Cas9 system for plant genome editing and beyond. *Biotechnology*  
976 *Advances* **33**: 41-52
- 977 **Brinkman EK, Chen T, Amendola M, van Steensel B** (2014) Easy quantitative assessment of genome  
978 editing by sequence trace decomposition. *Nucleic Acids Research* **42**: 8
- 979 **Carroll KJ, Makarewich CA, McAnally J, Anderson DM, Zentilin L, Liu N, Giacca M, Bassel-Duby R, Olson**  
980 **EN** (2016) A mouse model for adult cardiac-specific gene deletion with CRISPR/Cas9. *Proceedings*  
981 *of the National Academy of Sciences of the United States of America* **113**: 338-343
- 982 **Cermak T, Curtin SJ, Gil-Humanes J, Cegan R, Kono TJY, Konecna E, Belanto JJ, Starker CG, Mathre JW,**  
983 **Greenstein RL, Voytasa DF** (2017) A Multipurpose Toolkit to Enable Advanced Genome  
984 Engineering in Plants. *Plant Cell* **29**: 1196-1217
- 985 **Clough SJ, Bent AF** (1998) Floral dip: a simplified method for *Agrobacterium*-mediated transformation of  
986 *Arabidopsis thaliana*. *Plant Journal* **16**: 735-743
- 987 **De Rybel B, Vassileva V, Parizot B, Demeulenaere M, Grunewald W, Audenaert D, Van Campenhout J,**  
988 **Overvoorde P, Jansen L, Vanneste S, Moller B, Wilson M, Holman T, Van Isterdael G, Brunoud**  
989 **G, Vuylsteke M, Vernoux T, De Veylder L, Inze D, Weijers D, Bennett MJ, Beeckman T** (2010) A  
990 Novel Aux/IAA28 Signaling Cascade Activates GATA23-Dependent Specification of Lateral Root  
991 Founder Cell Identity. *Current Biology* **20**: 1697-1706
- 992 **De Smet I, Lau S, Voss U, Vanneste S, Benjamins R, Rademacher EH, Schlereth A, De Rybel B, Vassileva**  
993 **V, Grunewald W, Naudts M, Levesque MP, Ehrismann JS, Inze D, Luschnig C, Benfey PN,**  
994 **Weijers D, Van Montagu MCE, Bennett MJ, Jurgens G, Beeckman T** (2010) Bimodular auxin  
995 response controls organogenesis in Arabidopsis. *Proceedings of the National Academy of*  
996 *Sciences of the United States of America* **107**: 2705-2710
- 997 **De Veylder L, Beeckman T, Inze D** (2007) The ins and outs of the plant cell cycle. *Nature Reviews*  
998 *Molecular Cell Biology* **8**: 655-665
- 999 **Edwards K, Johnstone C, Thompson C** (1991) A simple and rapid method for the preparation of plant  
1000 genomic DNA for PCR analysis. *Nucleic Acids Research* **19**: 1349

- 1001 **Engler C, Kandzia R, Marillonnet S** (2008) A One Pot, One Step, Precision Cloning Method with High  
1002 Throughput Capability. *Plos One* **3**: 7
- 1003 **Fendrych M, Van Haute gem T, Van Durme M, Olvera-Carrillo Y, Huysmans M, Karimi M, Lippens S,**  
1004 **Guerin CJ, Krebs M, Schumacher K, Nowack MK** (2014) Programmed Cell Death Controlled by  
1005 ANACO33/SOMBRERO Determines Root Cap Organ Size in Arabidopsis. *Current Biology* **24**: 931-  
1006 940
- 1007 **Fu JL, Kanno T, Liang SC, Matzke AJM, Matzke M** (2015) GFP Loss-of-Function Mutations in Arabidopsis  
1008 thaliana. *G3-Genes Genomes Genetics* **5**: 1849-1855
- 1009 **Fukaki H, Nakao Y, Okushima Y, Theologis A, Tasaka M** (2005) Tissue-specific expression of stabilized  
1010 SOLITARY-ROOT/IAA14 alters lateral root development in Arabidopsis. *Plant Journal* **44**: 382-395
- 1011 **Houbaert A, Zhang C, Tiwari M, Wang K, de Marcos Serrano A, Savatin DV, Zhiponova MK, Gudesblat**  
1012 **GE, Vanhoutte I, Eeckhout D, Boeren S, Karimi M, Betti C, Jacobs T, Fenoll C, Mena M, de Vries**  
1013 **S, Jaeger GD, Russinova E** (2018) POLAR-guided signaling complex  
1014 assembly and localization drive asymmetric cell division. **Accepted on 26/09/2018**
- 1015 **Hyun Y, Kim J, Cho S, Choi Y, Kim JS, Coupland G** (2015) Site-directed mutagenesis in Arabidopsis  
1016 thaliana using dividing tissue-targeted RGEN of the CRISPR/Cas system to generate heritable null  
1017 alleles. *Planta* **241**: 271-284
- 1018 **Ingouff M, Selles B, Michaud C, Vu TM, Berger F, Schorn AJ, Autran D, Van Durme M, Nowack MK,**  
1019 **Martienssen RA, Grimanelli D** (2017) Live-cell analysis of DNA methylation during sexual  
1020 reproduction in Arabidopsis reveals context and sex-specific dynamics controlled by  
1021 noncanonical RdDM. *Genes & Development* **31**: 72-83
- 1022 **Inze D, De Veylder L** (2006) Cell cycle regulation in plant development. *In Annual Review of Genetics, Vol*  
1023 *40. Annual Reviews, Palo Alto, pp 77-105*
- 1024 **Jinek M, Chylinski K, Fonfara I, Hauer M, Doudna JA, Charpentier E** (2012) A programmable dual-RNA-  
1025 guided DNA endonuclease in adaptive bacterial immunity. *Science* **337**: 816-821
- 1026 **Karimi M, De Meyer B, Hilson P** (2005) Modular cloning in plant cells. *Trends in Plant Science* **10**: 103-  
1027 105
- 1028 **Kumpf RP, Nowack MK** (2015) The root cap: a short story of life and death. *Journal of Experimental*  
1029 *Botany* **66**: 5651-5662
- 1030 **Kurihara D, Mizuta Y, Sato Y, Higashiyama T** (2015) ClearSee: a rapid optical clearing reagent for whole-  
1031 plant fluorescence imaging. *Development* **142**: 4168-4179
- 1032 **Lampropoulos A, Sutikovic Z, Wenzl C, Maegele I, Lohmann JU, Forner J** (2013) GreenGate - A Novel,  
1033 Versatile, and Efficient Cloning System for Plant Transgenesis. *Plos One* **8**: 15
- 1034 **Lawson T** (2009) Guard cell photosynthesis and stomatal function. *New Phytologist* **181**: 13-34
- 1035 **Lennen RM, Wallin AIN, Pedersen M, Bonde M, Luo H, Herrgard MJ, Sommer MOA** (2016) Transient  
1036 overexpression of DNA adenine methylase enables efficient and mobile genome engineering  
1037 with reduced off-target effects. *Nucleic Acids Research* **44**: 14
- 1038 **Liang Y, Eudes A, Yogiswara S, Jing BB, Benites VT, Yamanaka R, Cheng-Yue C, Baidoo EE, Mortimer JC,**  
1039 **Scheller HV, Loque D** (2019) A screening method to identify efficient sgRNAs in Arabidopsis, used  
1040 in conjunction with cell-specific lignin reduction. *Biotechnology for Biofuels* **12**: 15
- 1041 **Lloyd JP, Seddon AE, Moghe GD, Simenc MC, Shiu SH** (2015) Characteristics of Plant Essential Genes  
1042 Allow for within-and between-Species Prediction of Lethal Mutant Phenotypes. *Plant Cell* **27**:  
1043 2133-2147
- 1044 **Lowder LG, Zhang DW, Baltes NJ, Paul JW, Tang X, Zheng XL, Voytas DF, Hsieh TF, Zhang Y, Qi YP** (2015)  
1045 A CRISPR/Cas9 Toolbox for Multiplexed Plant Genome Editing and Transcriptional Regulation.  
1046 *Plant Physiology* **169**: 971-+



- 1047 **Lukowitz W, Roeder A, Parmenter D, Somerville C** (2004) A MAPKK kinase gene regulates extra-  
1048 embryonic cell fate in Arabidopsis. *Cell* **116**: 109-119
- 1049 **Lukowitz W, Roeder A, Parmenter D, Somerville C** (2004) A MAPKK kinase gene regulates extra-  
1050 embryonic cell fate in Arabidopsis. *Cell* **116**: 109-119
- 1051 **Mao YF, Zhang ZJ, Feng ZY, Wei PL, Zhang H, Botella JR, Zhu JK** (2016) Development of germ-line-  
1052 specific CRISPR-Cas9 systems to improve the production of heritable gene modifications in  
1053 Arabidopsis. *Plant Biotechnology Journal* **14**: 519-532
- 1054 **Marzec M, Hensel G** (2018) Targeted Base Editing Systems Are Available for Plants. *Trends Plant Sci*
- 1055 **Melnyk CW, Molnar A, Baulcombe DC** (2011) Intercellular and systemic movement of RNA silencing  
1056 signals. *Embo Journal* **30**: 3553-3563
- 1057 **Mitsuda N, Matsui K, Ikeda M, Nakata M, Oshima Y, Nagatoshi Y, Ohme-Takagi M** (2011) CRES-T, An  
1058 Effective Gene Silencing System Utilizing Chimeric Repressors. *In* L Yuan, SE Perry, eds, *Plant*  
1059 *Transcription Factors: Methods and Protocols*. Humana Press, Totowa, NJ, pp 87-105
- 1060 **Munoz-Nortes T, Candela H, Micol JL** (2017) Suitability of two distinct approaches for the high-  
1061 throughput study of the post-embryonic effects of embryo-lethal mutations in Arabidopsis.  
1062 *Scientific Reports* **7**: 12
- 1063 **Musiela TJ, Bayer M** (2014) YODA signalling in the early Arabidopsis embryo. *Biochemical Society*  
1064 *Transactions* **42**: 408-412
- 1065 **Nadeau JA, Sack FD** (2002) Control of stomatal distribution on the Arabidopsis leaf surface. *Science* **296**:  
1066 1697-1700
- 1067 **Negi J, Munemasa S, Song B, Tadakuma R, Fujita M, Azoulay-Shemer T, Engineer CB, Kusumi K, Nishida**  
1068 **I, Schroeder JI, Iba K** (2018) Eukaryotic lipid metabolic pathway is essential for functional  
1069 chloroplasts and CO<sub>2</sub> and light responses in Arabidopsis guard cells. *Proceedings of the National*  
1070 *Academy of Sciences of the United States of America* **115**: 9038-9043
- 1071 **Nowack MK, Harashima H, Dissmeyer N, Zhao XA, Bouyer D, Weimer AK, De Winter F, Yang F,**  
1072 **Schnittger A** (2012) Genetic Framework of Cyclin-Dependent Kinase Function in Arabidopsis.  
1073 *Developmental Cell* **22**: 1030-1040
- 1074 **Ohashi-Ito K, Bergmann DC** (2006) Arabidopsis FAMA controls the final proliferation/differentiation  
1075 switch during stomatal development. *Plant Cell* **18**: 2493-2505
- 1076 **Okushima Y, Fukaki H, Onoda M, Theologis A, Tasaka M** (2007) ARF7 and ARF19 regulate lateral root  
1077 formation via direct activation of LBD/ASL genes in Arabidopsis. *Plant Cell* **19**: 118-130
- 1078 **Okushima Y, Overvoorde PJ, Arima K, Alonso JM, Chan A, Chang C, Ecker JR, Hughes B, Lui A, Nguyen D,**  
1079 **Onodera C, Quach H, Smith A, Yu GX, Theologis A** (2005) Functional genomic analysis of the  
1080 AUXIN RESPONSE FACTOR gene family members in Arabidopsis thaliana: Unique and overlapping  
1081 functions of ARF7 and ARF19. *Plant Cell* **17**: 444-463
- 1082 **Pasin F, Kulasekaran S, Natale P, Simon-Mateo C, Garcia JA** (2014) Rapid fluorescent reporter  
1083 quantification by leaf disc analysis and its application in plant-virus studies. *Plant Methods* **10**: 11
- 1084 **Port F, Chen HM, Lee T, Bullock SL** (2014) Optimized CRISPR/Cas tools for efficient germline and somatic  
1085 genome engineering in Drosophila. *Proceedings of the National Academy of Sciences of the*  
1086 *United States of America* **111**: E2967-E2976
- 1087 **Qin GJ, Gu HY, Ma LG, Peng YB, Deng XW, Chen ZL, Qu LJ** (2007) Disruption of phytoene desaturase  
1088 gene results in albino and dwarf phenotypes in Arabidopsis by impairing chlorophyll, carotenoid,  
1089 and gibberellin biosynthesis. *Cell Research* **17**: 471-482
- 1090 **Schindelin J, Arganda-Carreras I, Frise E, Kaynig V, Longair M, Pietzsch T, Preibisch S, Rueden C, Saalfeld**  
1091 **S, Schmid B, Tinevez JY, White DJ, Hartenstein V, Eliceiri K, Tomancak P, Cardona A** (2012) Fiji:  
1092 an open-source platform for biological-image analysis. *Nature Methods* **9**: 676-682

- 1093 **Schurholz AK, Lopez-Salmeron V, Li Z, Forner J, Wenzl C, Gaillochet C, Augustin S, Vilches-Barro A,**  
1094 **Fuchs M, Gebert M, Lohmann JU, Greb T, Wolf S** (2018) A Comprehensive Toolkit for Inducible,  
1095 Cell Type-Specific Gene Expression in Arabidopsis. *Plant Physiol*  
1096 **Schwab R, Ossowski S, Riester M, Warthmann N, Weigel D** (2006) Highly specific gene silencing by  
1097 artificial microRNAs in Arabidopsis. *Plant Cell* **18**: 1121-1133  
1098 **Shimada TL, Shimada T, Hara-Nishimura I** (2010) A rapid and non-destructive screenable marker, FAST,  
1099 for identifying transformed seeds of Arabidopsis thaliana. *Plant Journal* **61**: 519-528  
1100 **Sieburth LE, Drews GN, Meyerowitz EM** (1998) Non-autonomy of AGAMOUS function in flower  
1101 development: use of a Cre/loxP method for mosaic analysis in Arabidopsis. *Development* **125**:  
1102 4303-4312  
1103 **Smekalova V, Luptovciak I, Komis G, Samajova O, Ovecka M, Doskocilova A, Takac T, Vadovic P, Novak**  
1104 **O, Pechan T, Ziemann A, Kosutova P, Samaj J** (2014) Involvement of YODA and mitogen  
1105 activated protein kinase 6 in Arabidopsis post-embryonic root development through auxin up-  
1106 regulation and cell division plane orientation. *New Phytol*  
1107 **Sommer C, Straehle C, Kothe U, Hamprecht FA, Ieee** (2011) ILASTIK: INTERACTIVE LEARNING AND  
1108 SEGMENTATION TOOLKIT. 2011 8th Ieee International Symposium on Biomedical Imaging: from  
1109 Nano to Macro: 230-233  
1110 **Ursache R, Andersen TG, Marhavy P, Geldner N** (2018) A protocol for combining fluorescent proteins  
1111 with histological stains for diverse cell wall components. *Plant Journal* **93**: 399-412  
1112 **von Wangenheim D, Fangerau J, Schmitz A, Smith RS, Leitte H, Stelzer EHK, Maizel A** (2016) Rules and  
1113 Self-Organizing Properties of Post-embryonic Plant Organ Cell Division Patterns. *Current Biology*  
1114 **26**: 439-449  
1115 **Willemsen V, Bauch M, Bennett T, Campilho A, Wolkenfelt H, Xu J, Haseloff J, Scheres B** (2008) The NAC  
1116 Domain Transcription Factors FEZ and SOMBRERO Control the Orientation of Cell Division Plane  
1117 in Arabidopsis Root Stem Cells. *Developmental Cell* **15**: 913-922  
1118 **Xing HL, Dong L, Wang ZP, Zhang HY, Han CY, Liu B, Wang XC, Chen QJ** (2014) A CRISPR/Cas9 toolkit for  
1119 multiplex genome editing in plants. *Bmc Plant Biology* **14**: 12  
1120 **Yan LH, Wei SW, Wu YR, Hu RL, Li HJ, Yang WC, Xie Q** (2015) High-Efficiency Genome Editing in  
1121 Arabidopsis Using YAO Promoter-Driven CRISPR/Cas9 System. *Molecular Plant* **8**: 1820-1823  
1122  
1123

1124 **Acknowledgements**

1125 We thank Dominique Bergmann, Camila Lopez-Anido, Michael Raissig, and the members  
1126 of the Programmed Cell Death and Plant Genome Editing teams at VIB for constructive  
1127 discussions. We also thank Veronique Storme for assistance with statistical analysis. The  
1128 GreenGate plasmid kit used for generation of plant transformation constructs was a gift  
1129 from Jan Lohmann (Addgene kit # 1000000036). The coding sequence for mRuby3 was  
1130 derived from pNCS-mRuby3, which was a gift from Michael Lin (Addgene plasmid #  
1131 74234). We thank Carina Braeckman (VIB-UGent Center for Plant Systems Biology) for  
1132 the help with the *A. thaliana* floral dip transformation. We thank Nico Smet, Miguel Riobello  
1133 y Barea, Thomas Farla, and Sandra Lefftz for greenhouse support. We thank Debbie  
1134 Rombaut and Freya De Winter for the help with the preparation of root protoplasts. We  
1135 thank Eugenia Russinova for a critical review of the manuscript. We gratefully  
1136 acknowledge funding by the ERC StG PROCELLDEATH (Project 639234) to M.K.N., and  
1137 by the FWO 1174119N to M.L.P.

1138 **Author contributions**

1139 W.D., R.A.B., M.K.N., and T.B.J. conceived and devised the study. M.K. adapted the  
1140 GreenGate vectors and provided additional cloning support. W.D. constructed the vectors  
1141 and performed the genotyping analysis. R.A.B., M.L.P., N.V. and J.J. performed the  
1142 experiments, imaging and analysis. W.D., J.J. and R.A.B. performed statistical analysis.  
1143 G.V.I. and R.A.B. performed the FACS experiments and analysis. W.D., T.B.J., R.A.B.,  
1144 M.K.N. and T.B. wrote the manuscript with contributions from all other authors.

1145 **Additional information**

1146

1147 **Supplementary information** accompanies this paper at **XXX**

1148 **Conflicts of interest**

1149 The authors declare no conflicts of interest.
